# Supplementary material for: Synthesis, electrochemical and theoretical studies of the Au(i)-Cu(i) heterometallic clusters bearing ferrocenyl groups
Source: Royal Society of Chemistry journal article supplement (doi:10.1039/b901816f), 2009-01-01
Supplement: b901816f.pdf [file b901816f.pdf]

## Supporting Information

### Synthesis, Electrochemical and Theoretical Studies of the Au(I)-Cu(I) Heterometallic Clusters Bearing Ferrocenyl Groups

Igor O. Koshevoy,<sup>\*a</sup> Ekaterina S. Smirnova,<sup>a,b</sup> Antonio Doménech,<sup>c</sup> Antti J. Karttunen,<sup>a</sup> Matti Haukka,<sup>a</sup> Sergey P. Tunik<sup>b</sup> and Tapani A. Pakkanen<sup>\*a</sup>

University of Joensuu, 80101, Joensuu, Finland;

St.-Petersburg State University, Universitetskii pr. 26, 198504, St.-Petersburg, Russia;

University of Valencia, Dr. Moliner 50, 46100 Burjassot, Valencia, Spain.

E-mail: [igor.koshevoy@joensuu.fi](mailto:igor.koshevoy@joensuu.fi); [tapani.pakkanen@joensuu.fi](mailto:tapani.pakkanen@joensuu.fi)

**Table S1.** Crystal data and structure refinement for **3**.

|                                   |                                                                                                                                 |                                |
|-----------------------------------|---------------------------------------------------------------------------------------------------------------------------------|--------------------------------|
| Identification code               | <b>3</b>                                                                                                                        |                                |
| Empirical formula                 | C <sub>174</sub> H <sub>151</sub> Au <sub>6</sub> Cu <sub>2</sub> F <sub>12</sub> Fe <sub>6</sub> O <sub>3</sub> P <sub>8</sub> |                                |
| Formula weight                    | 4409.69                                                                                                                         |                                |
| Temperature                       | 120(2) K                                                                                                                        |                                |
| Wavelength                        | 0.71073 Å                                                                                                                       |                                |
| Crystal system                    | Trigonal                                                                                                                        |                                |
| Space group                       | R 3                                                                                                                             |                                |
| Unit cell dimensions              | a = 24.7994(3) Å<br>b = 24.7994(3) Å<br>c = 46.1400(7) Å                                                                        | α = 90°<br>β = 90°<br>γ = 120° |
| Volume                            | 24574.8(6) Å <sup>3</sup>                                                                                                       |                                |
| Z                                 | 6                                                                                                                               |                                |
| Density (calculated)              | 1.788 Mg/m <sup>3</sup>                                                                                                         |                                |
| Absorption coefficient            | 6.260 mm <sup>-1</sup>                                                                                                          |                                |
| F(000)                            | 12810                                                                                                                           |                                |
| Crystal size                      | 0.12 x 0.09 x 0.09 mm <sup>3</sup>                                                                                              |                                |
| Theta range for data collection   | 2.55 to 25.25°                                                                                                                  |                                |
| Index ranges                      | -29 ≤ h ≤ 29, -28 ≤ k ≤ 29, -55 ≤ l ≤ 55                                                                                        |                                |
| Reflections collected             | 134450                                                                                                                          |                                |
| Independent reflections           | 9886 [R(int) = 0.0931]                                                                                                          |                                |
| Completeness to theta = 25.25°    | 99.9 %                                                                                                                          |                                |
| Absorption correction             | Semi-empirical from equivalents                                                                                                 |                                |
| Max. and min. transmission        | 0.6027 and 0.5229                                                                                                               |                                |
| Refinement method                 | Full-matrix least-squares on F <sup>2</sup>                                                                                     |                                |
| Data / restraints / parameters    | 9886 / 63 / 650                                                                                                                 |                                |
| Goodness-of-fit on F <sup>2</sup> | 1.062                                                                                                                           |                                |
| Final R indices [I > 2σ(I)]       | R1 = 0.0449, wR2 = 0.0956                                                                                                       |                                |
| R indices (all data)              | R1 = 0.0650, wR2 = 0.1025                                                                                                       |                                |
| Largest diff. peak and hole       | 1.411 and -0.846 e.Å <sup>-3</sup>                                                                                              |                                |



**Figure S1.** ESI-MS spectra of the  $[\{Au_3Cu_2(C_2-R)_6\}Au_3(PPh_2C_6H_4PPh_2)_3]^{2+}$  ( $R = Fc$ ,  $R = 4-C_6H_4-Fc$ ) dications (**3**, **4-2PF<sub>6</sub>**).



**Figure S2.** Variable temperature <sup>1</sup>H NMR spectra of **3** (300 MHz, CD<sub>2</sub>Cl<sub>2</sub>). \* denotes admixture.



**Figure S3.** <sup>1</sup>H NMR spectrum of **4** (400 MHz, CD<sub>2</sub>Cl<sub>2</sub>, 25 °C).



**Figure S4.**  $^1\text{H}$  COSY NMR spectrum of **4** (400 MHz,  $\text{CD}_2\text{Cl}_2$ ,  $25^\circ\text{C}$ ).



**Figure S5.** Cyclic voltammograms at GCE of the complexes **1** (a), **2** (b) 0.50 mM in 0.10 M  $\text{Bu}_4\text{NPF}_6/\text{CH}_2\text{Cl}_2$  solutions. Potential scan rate 50 mV/s.



**Figure S6.** Deconvolution of CV at GCE of **4** (0.40 mM) in 0.10 M solution  $\text{Bu}_4\text{NPF}_6/\text{CH}_2\text{Cl}_2$ . Temperature 263 K. Potential scan rate 500 mV/s.

### Computational supporting information



**Figure S7.** Frontier molecular orbital isodensity plots for the dicationic Au(I)-Cu(I) complexes **3** and **4** in  $D_{3h}$ -symmetry (isodensity value 0.04). Phenyl rings of the “belt” fragment and hydrogen atoms omitted for clarity.

Optimized cartesian coordinates of the studied systems in atomic units (BP86 level of theory):

$[\{\text{Au}_3\text{Cu}_2(\text{C}_2\text{Fc})_6\}\text{Au}_3(\text{PPh}_2\text{C}_6\text{H}_4\text{PPh}_2)_3]^{2+}$  (3),  $C_1$ -symmetry

|                   |                   |                   |    |
|-------------------|-------------------|-------------------|----|
| 20.77443499411144 | 16.18313296295928 | 7.21206098664315  | au |
| 17.07016157411250 | 20.11519405815596 | 7.30951171993591  | au |
| 23.43352956299668 | 13.52316344661167 | 11.08081372198537 | cu |
| 23.43730475448828 | 13.52612720803615 | 3.35340178534569  | cu |
| 21.39765044622550 | 21.52229556243281 | -3.29493210898450 | fe |
| 15.56626592482316 | 15.76549029793630 | 17.83398696310296 | fe |
| 13.55136610639898 | 17.40249128803171 | 6.56063408259024  | p  |
| 16.53689884014073 | 5.49008997816262  | 8.07678185918591  | p  |
| 12.39566712557280 | 17.71512377052582 | 3.28729870765857  | c  |
| 14.17933010703894 | 17.88072722624252 | 1.30509831409143  | c  |
| 16.22639457543763 | 17.88460903595518 | 1.71750394484169  | h  |
| 13.34485388168377 | 18.02526658914518 | -1.21218950619200 | c  |
| 14.74979049548965 | 18.13353557267966 | -2.74504960983970 | h  |
| 10.74734094209348 | 18.05611040189972 | -1.77029126708713 | c  |
| 10.10286271830671 | 18.19140507809817 | -3.74682825495568 | h  |
| 8.97318865823672  | 17.93547731113048 | 0.20152616196070  | c  |
| 6.93340359573510  | 17.98124004053741 | -0.21876745623315 | h  |
| 9.78790992445281  | 17.75700389976833 | 2.72219970081334  | c  |
| 8.37746906974760  | 17.66574815118223 | 4.25018643080865  | h  |
| 10.81803909113568 | 18.10302865560271 | 8.58698716057678  | c  |
| 10.54356988025904 | 20.57210749588316 | 9.56276671143981  | c  |
| 12.03221006618036 | 21.99072094871565 | 9.21009423638875  | h  |
| 8.39951017808118  | 21.21760601507720 | 10.98770982099190 | c  |
| 8.20501927210691  | 23.14722689108777 | 11.74658031526212 | h  |
| 6.52015514780757  | 19.40198828840331 | 11.46065115311643 | c  |
| 4.84366401202042  | 19.90594424134085 | 12.58940093657302 | h  |
| 6.78633923817104  | 16.93692211239189 | 10.50396383812134 | c  |
| 5.31522744632486  | 15.50890337562312 | 10.87399041896795 | h  |
| 8.92258123853254  | 16.28243013025105 | 9.07001821092445  | c  |
| 9.11018606531305  | 14.34665809705201 | 8.32425862300286  | h  |
| 14.19132356777480 | 13.98104114479587 | 6.97542914724855  | c  |
| 14.30338724892616 | 12.92605377621319 | 9.42214007208334  | c  |
| 13.92650072559156 | 14.09247363188243 | 11.10462901533764 | h  |
| 15.40330781413328 | 9.87251065634995  | 5.22158961849327  | c  |
| 15.87336871070045 | 8.73109558974719  | 3.54535820218399  | h  |
| 15.49614271124552 | 8.81219679688088  | 7.66809317845155  | c  |
| 14.91572454122482 | 10.36525700123050 | 9.75498578438122  | c  |
| 14.95374209905161 | 9.58201760597038  | 11.68101212939889 | h  |
| 14.73181521523932 | 12.41642427499555 | 4.88491417534866  | c  |
| 14.65827650671362 | 13.18891773304910 | 2.95575007237599  | h  |
| 14.44229637913069 | 3.60448295139091  | 6.04557802660747  | c  |
| 11.93837662456396 | 4.37514438246534  | 5.52270446375482  | c  |
| 11.22771402203883 | 6.19429639777726  | 6.24646722574248  | h  |
| 10.34498027881393 | 2.81915314321111  | 4.07753745379274  | c  |
| 8.39487584064546  | 3.43068589775711  | 3.67344645335951  | h  |
| 11.22924900223162 | 0.49049000336055  | 3.15131634805763  | c  |
| 9.97452699471396  | -0.72219387258156 | 2.01388110567294  | h  |
| 13.71772832605246 | -0.28270924066283 | 3.66480307010401  | c  |
| 14.42201998469555 | -2.09917712400852 | 2.92883242706808  | h  |
| 15.32303464882095 | 1.26918817801992  | 5.09956013348599  | c  |
| 17.28642065937714 | 0.67575546763745  | 5.48132703983289  | h  |
| 15.66774126600393 | 4.66598240410049  | 11.34678928174952 | c  |
| 13.44273387825606 | 3.30351987045822  | 11.90549892310524 | c  |
| 12.19877812570559 | 2.64548709667549  | 10.37173201178280 | h  |
| 12.80840843030439 | 2.76656142014013  | 14.42770729270772 | c  |
| 11.07479384918277 | 1.68954831782283  | 14.84502587693857 | h  |
| 14.37157703381263 | 3.60144094606097  | 16.40477141824226 | c  |
| 13.86399882626116 | 3.18626183855167  | 18.38219174747704 | h  |
| 16.59296853074486 | 4.95146685836137  | 15.85201001876623 | c  |

|                    |                   |                   |    |
|--------------------|-------------------|-------------------|----|
| 17.83356113053490  | 5.60760452215592  | 17.39025402757520 | h  |
| 17.26481260419239  | 5.46423512204518  | 13.33477775228755 | c  |
| 19.03078344221915  | 6.50097898212079  | 12.92475638410035 | h  |
| 20.09502226497812  | 15.60348556051814 | 10.93473980290688 | c  |
| 19.40950550291624  | 15.25707623742401 | 13.17968201039080 | c  |
| 18.70237083416228  | 14.70028731945993 | 15.71687487728534 | c  |
| 17.22785956230212  | 12.53231568696689 | 16.56048794731251 | c  |
| 16.39524840586520  | 11.09736118734513 | 15.31785868836876 | h  |
| 17.14071318631197  | 12.55362137013204 | 19.27362369037470 | c  |
| 16.16586494494663  | 11.16613901623449 | 20.47301505481866 | h  |
| 18.49934839770465  | 14.74193725540832 | 20.14551860167716 | c  |
| 18.75361920399751  | 15.30913855499452 | 22.12658770620359 | h  |
| 19.43123282876187  | 16.08021009244121 | 17.98081917935398 | c  |
| 20.60034496465082  | 17.79311618507563 | 18.00155965170501 | h  |
| 13.26345781190822  | 18.06923886210990 | 15.70388150331747 | c  |
| 13.63944812592783  | 18.70414371144776 | 13.76286505877726 | h  |
| 14.03823288270581  | 19.34424058071524 | 17.97422361913039 | c  |
| 15.07177019433641  | 21.14027049917136 | 18.06867330473787 | h  |
| 13.20581722480755  | 17.86346341035133 | 20.09670075410001 | c  |
| 13.51831328559957  | 18.31336013717441 | 22.09970390221333 | h  |
| 11.91321778852304  | 15.67331879837714 | 19.13656482574122 | c  |
| 11.06950217854011  | 14.15791289404325 | 20.27861330914145 | h  |
| 11.94974860768927  | 15.79941749815427 | 16.42001710386358 | c  |
| 11.11427865782398  | 14.40490741385276 | 15.12867008155236 | h  |
| 21.35647757464988  | 16.86061027449599 | 3.48937063102402  | c  |
| 21.71388447936702  | 17.54692538593314 | 1.24627339533696  | c  |
| 22.28202500375755  | 18.26705267034730 | -1.28445207730820 | c  |
| 24.53194071806430  | 19.61576347761842 | -2.12528497810090 | c  |
| 26.03563707159844  | 20.32317154725060 | -0.88521869369335 | h  |
| 24.47558428983151  | 19.77789748776356 | -4.83390364156542 | c  |
| 25.90738532092035  | 20.68977200574615 | -6.03054549537450 | h  |
| 22.18829225173348  | 18.59377854623974 | -5.70486606054290 | c  |
| 21.57616705635024  | 18.43302980044639 | -7.68229028932138 | h  |
| 20.82340780152564  | 17.69323552356357 | -3.54367511097583 | c  |
| 19.03483496413509  | 16.64429259325364 | -3.56659047958727 | h  |
| 19.26195356173668  | 23.89319009071192 | -1.06663746609843 | c  |
| 18.60845190360067  | 23.48908317163725 | 0.86271317379403  | h  |
| 21.61441915941624  | 25.07528083729905 | -1.74497756344309 | c  |
| 23.06709979851061  | 25.75895714356409 | -0.42886923095750 | h  |
| 21.73364507054663  | 25.20730640174574 | -4.45906414614386 | c  |
| 23.29930405326813  | 25.98862083793070 | -5.57753214591638 | h  |
| 19.45715575864299  | 24.10461308120891 | -5.45509802782558 | c  |
| 18.98026421323532  | 23.90083547202747 | -7.46588028493025 | h  |
| 17.92978028236203  | 23.29410399345562 | -3.35727799936704 | c  |
| 16.06633519451661  | 22.39073443213765 | -3.48157502891930 | h  |
| 22.46700635641410  | 9.88809489282704  | 7.21389923777959  | au |
| 20.90664489192021  | 4.71789200121489  | 7.31769912041373  | au |
| 17.54114824536477  | 7.77730943443399  | -3.30232475892552 | fe |
| 25.41057328304203  | 5.60496550438925  | 17.85330852720731 | fe |
| 25.01478082172276  | 3.02466332946584  | 6.57009701790220  | p  |
| 33.84274033569996  | 11.56767228536793 | 8.05224901022515  | p  |
| 25.31565413383926  | 1.85879032235919  | 3.29956244614637  | c  |
| 24.28876148824086  | 3.32386773211606  | 1.31523617238225  | c  |
| 23.27206912868567  | 5.10128441126962  | 1.72495608261385  | h  |
| 24.576122268249463 | 2.52384605275975  | -1.20083895999925 | c  |
| 23.78637807912270  | 3.68915416960430  | -2.73522079099519 | h  |
| 25.83508759101105  | 0.25083250911236  | -1.75584324299202 | c  |
| 26.037222635540284 | -0.37844052993309 | -3.73151263595702 | h  |
| 26.81741082886965  | -1.22854052659301 | 0.21814604659387  | c  |
| 27.78742147175078  | -3.02410695057938 | -0.19969124075097 | h  |
| 26.56926530159556  | -0.42896578560924 | 2.73787169446962  | c  |
| 27.34619496117754  | -1.60722877454114 | 4.26766650126703  | h  |
| 25.77741679587212  | 0.31468892894488  | 8.60547427009836  | c  |
| 23.77808243546934  | -1.14883327394142 | 9.59764707550940  | c  |

|                   |                   |                   |   |
|-------------------|-------------------|-------------------|---|
| 21.80466897427765 | -0.56796624827019 | 9.24985979338403  | h |
| 24.29387453579227 | -3.32084421225392 | 11.03317823305854 | c |
| 22.72152677358686 | -4.44763609752078 | 11.80472979677103 | h |
| 26.80676246782098 | -4.04088720095081 | 11.50123687447546 | c |
| 27.21043480864893 | -5.73864961491976 | 12.63846862825858 | h |
| 28.80683513030757 | -2.58604028612219 | 10.52859678541503 | c |
| 30.77977874922797 | -3.14576648317522 | 10.89524749449063 | h |
| 28.30276710975376 | -0.41710706347710 | 9.08310538461826  | c |
| 29.88377536311106 | 0.70688722825551  | 8.32437509912023  | h |
| 27.65950717738693 | 5.29023292131491  | 6.97430329672286  | c |
| 28.51454289726514 | 5.92677398088812  | 9.41892015691965  | c |
| 27.68988258048048 | 5.02610345003605  | 11.10476759872427 | h |
| 30.61532994302909 | 8.38343528012602  | 5.20837567291781  | c |
| 31.37155995628456 | 9.35261140618801  | 3.52829738107581  | h |
| 31.48462416543875 | 9.00580968451787  | 7.65275353407329  | c |
| 30.42627996387820 | 7.73848702530295  | 9.74508140139211  | c |
| 31.08203208365285 | 8.17435288404877  | 11.66960183811262 | h |
| 28.74740617362456 | 6.52928212299248  | 4.87874919089532  | c |
| 28.11749412488471 | 6.06977940472364  | 2.95104655489774  | h |
| 36.52355459600876 | 10.68871230999510 | 6.02505095033738  | c |
| 37.10238968907347 | 8.13360617194258  | 5.50284038592723  | c |
| 35.87478147009632 | 6.61170204879731  | 6.22063320253329  | h |
| 39.25077062216589 | 7.52592282153729  | 4.06629947665347  | c |
| 39.69199619975240 | 5.53012957958443  | 3.66347439770407  | h |
| 40.83508343122251 | 9.45168821814182  | 3.14801440391344  | c |
| 42.51605903516694 | 8.96714159681702  | 2.01743710274884  | h |
| 40.26589121420309 | 11.99477196477901 | 3.66063409910526  | c |
| 41.49490740568403 | 13.50958431807057 | 2.93104120983319  | h |
| 38.11494718341948 | 12.61491570148315 | 5.08626550733305  | c |
| 37.65190671512311 | 14.61312480702143 | 5.46732270939948  | h |
| 34.99367354219875 | 11.23742264593039 | 11.32286177407961 | c |
| 37.28317168601710 | 9.98701391834939  | 11.88331643504676 | c |
| 38.46864061450748 | 9.22579900232849  | 10.35105373422981 | h |
| 38.07074175334284 | 9.71811669931476  | 14.40512223987615 | c |
| 39.86799175050731 | 8.75151648394294  | 14.82354032727522 | h |
| 36.57474640952981 | 10.67187149376459 | 16.38037597146775 | c |
| 37.19275838063362 | 10.45037259986204 | 18.35754210375312 | h |
| 34.29743488137579 | 11.92461067662370 | 15.82600797633378 | c |
| 33.11621786940020 | 12.68490271417758 | 17.36313813302302 | h |
| 33.51157073716406 | 12.23712899563940 | 13.30887747995013 | c |
| 31.73244597012496 | 13.25044215648958 | 12.89760696299891 | h |
| 23.30456952431614 | 9.59146990567642  | 10.93749705690295 | c |
| 23.94494503571797 | 9.17648104984005  | 13.18406391916266 | c |
| 24.78149686311131 | 8.84796438212087  | 15.72187874435496 | c |
| 27.39643172749258 | 8.64244586853281  | 16.56235473786039 | c |
| 29.05323484708231 | 8.62094547161819  | 15.31699453543250 | h |
| 27.42521131933854 | 8.56925297856659  | 19.27568803145661 | c |
| 29.11489999405708 | 8.41296982440541  | 20.47336061055620 | h |
| 24.85260791965098 | 8.67173023415381  | 20.15103846083236 | c |
| 24.23697444760183 | 8.62140644798595  | 22.13330103660192 | h |
| 23.22494876600644 | 8.80935515870747  | 17.98831673889001 | c |
| 21.15797930006205 | 8.97766317034953  | 18.01083725382026 | h |
| 24.51714366124476 | 2.45243133348715  | 15.75156041606514 | c |
| 23.75143994944724 | 2.45605782751801  | 13.82124492922413 | h |
| 23.05970473579935 | 2.50630620558653  | 18.04351280629567 | c |
| 20.98925593662150 | 2.51566280030868  | 18.16883864791305 | h |
| 24.78961145767170 | 2.52654260294776  | 20.14061339940724 | c |
| 24.27342811121152 | 2.58496075288815  | 22.15114310854837 | h |
| 27.31799339200852 | 2.48278688746139  | 19.14306627552687 | c |
| 29.06903936465993 | 2.50512910432789  | 20.25931296607766 | h |
| 27.15009858533707 | 2.43842251300480  | 16.42888002183088 | c |
| 28.75552370616986 | 2.39435368221289  | 15.11319958818357 | h |
| 21.59323434663310 | 10.05525892854991 | 3.49066222010728  | c |
| 20.82311691472687 | 10.02785720682998 | 1.24645964794863  | c |

|                   |                   |                   |    |
|-------------------|-------------------|-------------------|----|
| 19.91788231371120 | 10.16531106480253 | -1.28482449818858 | c  |
| 17.62626130808502 | 11.44208013340685 | -2.12503231533062 | c  |
| 16.26044105723218 | 12.38813885054137 | -0.88449442184334 | h  |
| 17.51684522642488 | 11.31814959035391 | -4.83406122112021 | c  |
| 16.01237068213021 | 12.10451525638658 | -6.03057703991025 | h  |
| 19.68595206045103 | 9.92990542178068  | -5.70567258912214 | c  |
| 20.13311526988276 | 9.48420600670413  | -7.68359322687945 | h  |
| 21.14595588143836 | 9.19301038323260  | -3.54471707087547 | c  |
| 22.94862446747397 | 8.16861384745017  | -3.56796469997946 | h  |
| 16.55105110554993 | 4.73732250022424  | -1.08174848020153 | c  |
| 17.22785287641135 | 4.36563417996334  | 0.84634893968183  | h  |
| 14.35445267218117 | 6.19128081676299  | -1.75439354651838 | c  |
| 13.03900330172092 | 7.10652482123172  | -0.43450548942724 | h  |
| 14.17825791699535 | 6.23592785816757  | -4.46821145888213 | c  |
| 12.71957440447819 | 7.20686744321524  | -5.58282431512449 | h  |
| 16.26761669874146 | 4.81399751246240  | -5.46977423789930 | c  |
| 16.68015469251172 | 4.50701752980389  | -7.48169317400908 | h  |
| 17.73278560815682 | 3.88737713670044  | -3.37560303119044 | c  |
| 19.44401845360334 | 2.72153280104454  | -3.50467024713607 | h  |
| 27.06967215232049 | 14.50090449869981 | 7.22073368311774  | au |
| 32.32758001975139 | 15.73762685866214 | 7.28756752229407  | au |
| 31.36269355605285 | 11.31772432789552 | -3.30657074651545 | fe |
| 29.28775135378927 | 19.21921139560765 | 17.85268988007392 | fe |
| 31.73574569836588 | 20.14194816824694 | 6.54601558377304  | p  |
| 19.92715038527289 | 23.51059241349649 | 8.07187755949601  | p  |
| 32.58765344743959 | 20.99570544970135 | 3.27626059112060  | c  |
| 31.82965592430646 | 19.37994785150802 | 1.28803328613791  | c  |
| 30.80073813995524 | 17.60872249557410 | 1.69420761220449  | h  |
| 32.37452270964005 | 20.03706965289643 | -1.22687511409649 | c  |
| 31.75728496947739 | 18.77581552061702 | -2.76432420135632 | h  |
| 33.71332341264258 | 22.26518526859181 | -1.77695778578580 | c  |
| 34.15507793792817 | 22.76049530587645 | -3.75170995756661 | h  |
| 34.50605664330907 | 23.84951715597561 | 0.20074954251505  | c  |
| 35.57601499472814 | 25.58833833285926 | -0.21310400507068 | h  |
| 33.94069296691860 | 23.22729893346063 | 2.71927617458242  | c  |
| 34.57447104165355 | 24.48502049188220 | 4.25186005243305  | h  |
| 33.70374280351538 | 22.15431279727807 | 8.58225477973782  | c  |
| 35.97415112559602 | 21.15531625429112 | 9.56782548559926  | c  |
| 36.45947006746667 | 19.15710565866691 | 9.21494914175212  | h  |
| 37.59839298402022 | 22.68702735762664 | 11.00319515337569 | c  |
| 39.36262799367023 | 21.88912785556639 | 11.76994617833025 | h  |
| 36.96381529559699 | 25.22181473174189 | 11.47683326488963 | c  |
| 38.23355091025815 | 26.41996087970178 | 12.61301664111093 | h  |
| 34.70049436058903 | 26.22564554663087 | 10.51110478108223 | c  |
| 34.19736096413027 | 28.21286077128321 | 10.88270285958134 | h  |
| 33.07269195628667 | 24.70549610897842 | 9.06638661313862  | c  |
| 31.30617550610755 | 25.51180294260589 | 8.31312832704739  | h  |
| 28.45201484820619 | 21.29630568013080 | 6.96243295013246  | c  |
| 27.47768141482889 | 21.70277391940252 | 9.41158485402197  | c  |
| 28.67272591479871 | 21.42783651700940 | 11.09369205478053 | h  |
| 24.29249127159388 | 22.32271214550423 | 5.21084384433521  | c  |
| 23.07238240178091 | 22.50444422427213 | 3.53383684874920  | h  |
| 23.32350697111271 | 22.74908623261927 | 7.65983267594886  | c  |
| 24.95383417009973 | 22.45125090336800 | 9.74725354386697  | c  |
| 24.25292031784905 | 22.78832356092930 | 11.67562720994628 | h  |
| 26.83146516235228 | 21.63359028035882 | 4.87203964816411  | c  |
| 27.54124850369445 | 21.33157258850551 | 2.94091005367407  | h  |
| 19.34144258421050 | 26.27209141145205 | 6.04719951182774  | c  |
| 21.26306092091523 | 28.05045322097098 | 5.51715189935056  | c  |
| 23.19726627894664 | 27.74895216366816 | 6.22857796181465  | h  |
| 20.71051869402648 | 30.21315156887616 | 4.07977400942670  | c  |
| 22.21710167504876 | 31.59249011097112 | 3.67006407323569  | h  |
| 18.24782293914237 | 30.62122519917989 | 3.16836823982012  | c  |
| 17.82384246065564 | 32.31762569112945 | 2.03650261931486  | h  |

|                   |                   |                   |   |
|-------------------|-------------------|-------------------|---|
| 16.33153786107841 | 28.85763194711917 | 3.68942151012068  | c |
| 14.40280906108689 | 29.16366471854625 | 2.96582921517747  | h |
| 16.87461065862835 | 26.68658951927313 | 5.11597671231547  | c |
| 15.37691173092847 | 25.28667955095482 | 5.50305437222978  | h |
| 19.65173310559074 | 24.67175479863896 | 11.34389353189874 | c |
| 19.60230948936925 | 27.27985819069492 | 11.90528566299725 | c |
| 19.66718243935431 | 28.68738799905534 | 10.37307078051677 | h |
| 19.45598466648039 | 28.09633509955829 | 14.42793174487166 | c |
| 19.40295752281967 | 30.13614058430270 | 14.84719462411013 | h |
| 19.38207571999748 | 26.32353333727697 | 16.40306997300797 | c |
| 19.27704467568205 | 26.96948461356381 | 18.38098376113702 | h |
| 19.42361923290616 | 23.72489697190295 | 15.84794431470252 | c |
| 19.35939708324341 | 22.32185216596514 | 17.38509815886103 | h |
| 19.52934522359294 | 22.88824456627989 | 13.32987730522317 | c |
| 19.53058258420376 | 20.84092098057198 | 12.91775213244350 | h |
| 26.90484738190170 | 15.37443277370147 | 10.94447059804206 | c |
| 26.94530009664065 | 16.13675069621489 | 13.19093428138117 | c |
| 26.81357016146823 | 17.02056333690587 | 15.73042278341304 | c |
| 25.65461985875232 | 19.36961627870006 | 16.58172457740477 | c |
| 24.81671952188089 | 20.80568530466719 | 15.34391616553855 | h |
| 25.71765543333441 | 19.42649055155574 | 19.29502627151441 | c |
| 24.99226265811749 | 20.95494647514753 | 20.49986572320832 | h |
| 26.95359330078444 | 17.16365689471879 | 20.15912539857169 | c |
| 27.32407191636320 | 16.65728900905756 | 22.13827812902779 | h |
| 27.65731376303662 | 15.69989169233005 | 17.98963483592072 | c |
| 28.57251347231993 | 13.83897022118528 | 18.00381329386476 | h |
| 32.43056053565699 | 20.09232504484388 | 15.72761207027215 | c |
| 32.80213997867883 | 19.45746528924455 | 13.78553127783707 | h |
| 33.15417691962381 | 18.78444823750288 | 17.99610161333044 | c |
| 34.20685046015128 | 16.99934682297342 | 18.08813422602678 | h |
| 32.27397338815759 | 20.23471379916831 | 20.12052002005501 | c |
| 32.50946280428857 | 19.73743525290352 | 22.12293676371607 | h |
| 31.00653050398441 | 22.44077150050779 | 19.16319939986730 | c |
| 30.10299454648144 | 23.91975307211146 | 20.30725968730388 | h |
| 31.10183494947002 | 22.35250246736055 | 16.44659576480701 | c |
| 30.30303320636465 | 23.76959839441955 | 15.15654481643281 | h |
| 27.36501129502918 | 13.66263280037777 | 3.49729279058381  | c |
| 27.77380461107742 | 13.01331488385043 | 1.25192967456392  | c |
| 28.10665429993061 | 12.16716383962027 | -1.28177323486676 | c |
| 28.15318132898307 | 9.54622918126497  | -2.12884540366288 | c |
| 28.02272424991154 | 7.88683822050213  | -0.89222884570809 | h |
| 28.31154405104905 | 9.52090144034926  | -4.83813858182317 | c |
| 28.38561670255882 | 7.82816012177429  | -6.03932961683302 | h |
| 28.41998072848753 | 12.09615745741848 | -5.70340513757755 | c |
| 28.57721082542202 | 12.71174415421361 | -7.68007297853401 | h |
| 28.32651188288940 | 13.72319338959707 | -3.53810921346618 | c |
| 28.30656335008836 | 15.79657913204769 | -3.55604712242681 | h |
| 34.49272875815220 | 11.98594132841381 | -1.09093730506126 | c |
| 34.47643409338942 | 12.75454435920491 | 0.83836541414364  | h |
| 34.33926533313858 | 9.35730406511111  | -1.76785827472332 | c |
| 34.21168684992875 | 7.75787315643171  | -0.45042905416682 | h |
| 34.38302744314798 | 9.18724725233791  | -4.48207553351898 | c |
| 34.27356579183214 | 7.44028180345531  | -5.59952320481882 | h |
| 34.56024737403257 | 11.70995989312942 | -5.47967473043275 | c |
| 34.61371382758365 | 12.22458397993272 | -7.49070228385304 | h |
| 34.62942649635607 | 13.43861411504226 | -3.38256398647807 | c |
| 34.77681786460393 | 15.50416647681620 | -3.50784015188189 | h |

$[\{\text{Au}_3\text{Cu}_2(\text{C}_2\text{Fc})_6\}\text{Au}_3(\text{PPh}_2\text{C}_6\text{H}_4\text{PPh}_2)_3]^{2+}$  (3),  $D_{3h}$ -symmetry

|                   |                   |                  |    |
|-------------------|-------------------|------------------|----|
| -1.91866807456961 | -3.32323058801486 | 0.00000000000000 | au |
| -1.91866807456961 | 3.32323058801486  | 0.00000000000000 | au |
| 3.83733614913923  | 0.00000000000000  | 0.00000000000000 | au |

|                    |                    |                   |    |
|--------------------|--------------------|-------------------|----|
| -4.66740943497781  | -8.08419028110789  | 0.000000000000000 | au |
| -4.66740943497781  | 8.08419028110789   | 0.000000000000000 | au |
| 9.33481886995564   | 0.000000000000000  | 0.000000000000000 | au |
| 0.000000000000000  | 0.000000000000000  | 3.69606127309077  | cu |
| 0.000000000000000  | 0.000000000000000  | -3.69606127309077 | cu |
| -0.96626717815601  | -10.66439244328063 | 0.000000000000000 | p  |
| -8.75250118272979  | -6.16900814476651  | 0.000000000000000 | p  |
| -0.96626717815601  | 10.66439244328063  | 0.000000000000000 | p  |
| -8.75250118272979  | 6.16900814476651   | 0.000000000000000 | p  |
| 9.71876836088580   | -4.49538429851412  | 0.000000000000000 | p  |
| 9.71876836088580   | 4.49538429851412   | 0.000000000000000 | p  |
| -1.97843125989019  | -3.42674346141230  | 3.82718976643638  | c  |
| -1.97843125989019  | 3.42674346141230   | 3.82718976643638  | c  |
| 3.95686251978038   | 0.000000000000000  | 3.82718976643638  | c  |
| -1.97843125989019  | -3.42674346141230  | -3.82718976643638 | c  |
| 3.95686251978038   | 0.000000000000000  | -3.82718976643638 | c  |
| -1.97843125989019  | 3.42674346141230   | -3.82718976643638 | c  |
| -2.24844133782762  | -3.89441463495560  | 6.13679999992039  | c  |
| -2.24844133782762  | 3.89441463495560   | 6.13679999992039  | c  |
| 4.49688267565534   | 0.000000000000000  | 6.13679999992039  | c  |
| -2.24844133782762  | -3.89441463495560  | -6.13679999992039 | c  |
| 4.49688267565534   | 0.000000000000000  | -6.13679999992039 | c  |
| -2.24844133782762  | 3.89441463495560   | -6.13679999992039 | c  |
| 2.01178380366104   | 8.84947443153832   | 0.000000000000000 | c  |
| 3.13602564303193   | 8.08450622928340   | -2.29632977920666 | c  |
| 3.13602564303193   | 8.08450622928340   | 2.29632977920666  | c  |
| 5.43337495009705   | 6.75813098842681   | -2.29632977920666 | c  |
| 5.43337495009705   | 6.75813098842681   | 2.29632977920666  | c  |
| 6.65797776602248   | 6.16699309666171   | 0.000000000000000 | c  |
| 6.65797776602248   | -6.16699309666171  | 0.000000000000000 | c  |
| 5.43337495009705   | -6.75813098842681  | -2.29632977920666 | c  |
| 5.43337495009705   | -6.75813098842681  | 2.29632977920666  | c  |
| 3.13602564303193   | -8.08450622928340  | -2.29632977920666 | c  |
| 3.13602564303193   | -8.08450622928340  | 2.29632977920666  | c  |
| 2.01178380366104   | -8.84947443153832  | 0.000000000000000 | c  |
| -8.66976156968352  | -2.68248133487656  | 0.000000000000000 | c  |
| -8.56940059312889  | -1.32637524085668  | -2.29632977920666 | c  |
| -8.56940059312889  | -1.32637524085668  | 2.29632977920666  | c  |
| -8.56940059312889  | 1.32637524085668   | -2.29632977920666 | c  |
| -8.56940059312889  | 1.32637524085668   | 2.29632977920666  | c  |
| -8.66976156968352  | 2.68248133487656   | 0.000000000000000 | c  |
| 11.54639504068434  | -5.78569332676624  | 2.68203358425599  | c  |
| 13.48650594229237  | -4.28567294969650  | 3.72663921713409  | c  |
| 11.28730253556140  | -8.32329576034589  | 3.47377310221487  | c  |
| 15.14453526653634  | -5.29933052415919  | 5.53530133739852  | c  |
| 12.93617359528976  | -9.32406194804470  | 5.29605389581579  | c  |
| 14.87097116022848  | -7.81912891752649  | 6.32404435533695  | c  |
| 11.54639504068434  | 5.78569332676624   | 2.68203358425599  | c  |
| 13.48650594229237  | 4.28567294969650   | 3.72663921713409  | c  |
| 11.28730253556140  | 8.32329576034589   | 3.47377310221487  | c  |
| 15.14453526653634  | 5.29933052415919   | 5.53530133739852  | c  |
| 12.93617359528976  | 9.32406194804470   | 5.29605389581579  | c  |
| 14.87097116022848  | 7.81912891752649   | 6.32404435533695  | c  |
| -0.76264012085647  | 12.89231809074639  | 2.68203358425599  | c  |
| -3.03175132439722  | 13.82249322916323  | 3.72663921713409  | c  |
| 1.56453430389010   | 13.93673861616960  | 3.47377310221487  | c  |
| -2.98291277629596  | 15.76521753140939  | 5.53530133739852  | c  |
| 1.60678771582169   | 15.86508593530879  | 5.29605389581579  | c  |
| -0.66392130207081  | 16.78820326246690  | 6.32404435533695  | c  |
| -10.78375491982782 | 7.10662476398015   | 2.68203358425599  | c  |
| -10.45475461789514 | 9.53682027946672   | 3.72663921713409  | c  |
| -12.85183683945159 | 5.61344285582377   | 3.47377310221487  | c  |
| -12.16162249024032 | 10.46588700725012  | 5.53530133739852  | c  |
| -14.54296131111142 | 6.54102398726405   | 5.29605389581579  | c  |

|                    |                    |                    |   |
|--------------------|--------------------|--------------------|---|
| -14.20704985815770 | 8.96907434494040   | 6.32404435533695   | c |
| -10.78375491982782 | -7.10662476398015  | 2.68203358425599   | c |
| -10.45475461789514 | -9.53682027946672  | 3.72663921713409   | c |
| -12.85183683945159 | -5.61344285582377  | 3.47377310221487   | c |
| -12.16162249024032 | -10.46588700725012 | 5.53530133739852   | c |
| -14.54296131111142 | -6.54102398726405  | 5.29605389581579   | c |
| -14.20704985815770 | -8.96907434494040  | 6.32404435533695   | c |
| -0.76264012085647  | -12.89231809074639 | 2.68203358425599   | c |
| -3.03175132439722  | -13.82249322916323 | 3.72663921713409   | c |
| 1.56453430389010   | -13.93673861616960 | 3.47377310221487   | c |
| -2.98291277629596  | -15.76521753140939 | 5.53530133739852   | c |
| 1.60678771582169   | -15.86508593530879 | 5.29605389581579   | c |
| -0.66392130207081  | -16.78820326246690 | 6.32404435533695   | c |
| 11.54639504068434  | -5.78569332676624  | -2.68203358425599  | c |
| 13.48650594229237  | -4.28567294969650  | -3.72663921713409  | c |
| 11.28730253556140  | -8.32329576034589  | -3.47377310221487  | c |
| 15.14453526653634  | -5.29933052415919  | -5.53530133739852  | c |
| 12.93617359528976  | -9.32406194804470  | -5.29605389581579  | c |
| 14.87097116022848  | -7.81912891752649  | -6.32404435533695  | c |
| -0.76264012085647  | -12.89231809074639 | -2.68203358425599  | c |
| -3.03175132439722  | -13.82249322916323 | -3.72663921713409  | c |
| 1.56453430389010   | -13.93673861616960 | -3.47377310221487  | c |
| -2.98291277629596  | -15.76521753140939 | -5.53530133739852  | c |
| 1.60678771582169   | -15.86508593530879 | -5.29605389581579  | c |
| -0.66392130207081  | -16.78820326246690 | -6.32404435533695  | c |
| -10.78375491982782 | -7.10662476398015  | -2.68203358425599  | c |
| -10.45475461789514 | -9.53682027946672  | -3.72663921713409  | c |
| -12.85183683945159 | -5.61344285582377  | -3.47377310221487  | c |
| -12.16162249024032 | -10.46588700725012 | -5.53530133739852  | c |
| -14.54296131111142 | -6.54102398726405  | -5.29605389581579  | c |
| -14.20704985815770 | -8.96907434494040  | -6.32404435533695  | c |
| -10.78375491982782 | 7.10662476398015   | -2.68203358425599  | c |
| -12.85183683945159 | 5.61344285582377   | -3.47377310221487  | c |
| -10.45475461789514 | 9.53682027946672   | -3.72663921713409  | c |
| -14.54296131111142 | 6.54102398726405   | -5.29605389581579  | c |
| -12.16162249024032 | 10.46588700725012  | -5.53530133739852  | c |
| -14.20704985815770 | 8.96907434494040   | -6.32404435533695  | c |
| -0.76264012085647  | 12.89231809074639  | -2.68203358425599  | c |
| 1.56453430389010   | 13.93673861616960  | -3.47377310221487  | c |
| -3.03175132439722  | 13.82249322916323  | -3.72663921713409  | c |
| 1.60678771582169   | 15.86508593530879  | -5.29605389581579  | c |
| -2.98291277629596  | 15.76521753140939  | -5.53530133739852  | c |
| -0.66392130207081  | 16.78820326246690  | -6.32404435533695  | c |
| 11.54639504068434  | 5.78569332676624   | -2.68203358425599  | c |
| 13.48650594229237  | 4.28567294969650   | -3.72663921713409  | c |
| 11.28730253556140  | 8.32329576034589   | -3.47377310221487  | c |
| 15.14453526653634  | 5.29933052415919   | -5.53530133739852  | c |
| 12.93617359528976  | 9.32406194804470   | -5.29605389581579  | c |
| 14.87097116022848  | 7.81912891752649   | -6.32404435533695  | c |
| 4.87710282309002   | 0.00000000000000   | 8.79787585037061   | c |
| 5.03985647283311   | -2.20462343435635  | 10.43759911792287  | c |
| 5.03985647283311   | 2.20462343435635   | 10.43759911792287  | c |
| 5.17447797945281   | -1.35936882517953  | 13.01066497449792  | c |
| 5.17447797945281   | 1.35936882517953   | 13.01066497449792  | c |
| 4.87710282309002   | 0.00000000000000   | -8.79787585037061  | c |
| 5.03985647283311   | 2.20462343435635   | -10.43759911792287 | c |
| 5.03985647283311   | -2.20462343435635  | -10.43759911792287 | c |
| 5.17447797945281   | 1.35936882517953   | -13.01066497449792 | c |
| 5.17447797945281   | -1.35936882517953  | -13.01066497449792 | c |
| -2.43855141154498  | -4.22369494166474  | -8.79787585037061  | c |
| -0.61066833648547  | -5.46695545407901  | -10.43759911792287 | c |
| -4.42918813634759  | -3.26233201972270  | -10.43759911792287 | c |
| -1.40999105400835  | -5.16091379411905  | -13.01066497449792 | c |
| -3.76448692544442  | -3.80154496893955  | -13.01066497449792 | c |

|                   |                    |                    |    |
|-------------------|--------------------|--------------------|----|
| -2.43855141154498 | 4.22369494166474   | -8.79787585037061  | c  |
| -4.42918813634759 | 3.26233201972270   | -10.43759911792287 | c  |
| -0.61066833648547 | 5.46695545407901   | -10.43759911792287 | c  |
| -3.76448692544442 | 3.80154496893955   | -13.01066497449792 | c  |
| -1.40999105400835 | 5.16091379411905   | -13.01066497449792 | c  |
| -2.43855141154498 | -4.22369494166474  | 8.79787585037061   | c  |
| -4.42918813634759 | -3.26233201972270  | 10.43759911792287  | c  |
| -0.61066833648547 | -5.46695545407901  | 10.43759911792287  | c  |
| -3.76448692544442 | -3.80154496893955  | 13.01066497449792  | c  |
| -1.40999105400835 | -5.16091379411905  | 13.01066497449792  | c  |
| -2.43855141154498 | 4.22369494166474   | 8.79787585037061   | c  |
| -0.61066833648547 | 5.46695545407901   | 10.43759911792287  | c  |
| -4.42918813634759 | 3.26233201972270   | 10.43759911792287  | c  |
| -1.40999105400835 | 5.16091379411905   | 13.01066497449792  | c  |
| -3.76448692544442 | 3.80154496893955   | 13.01066497449792  | c  |
| 11.33281237313370 | 1.35990230625011   | -12.71233586404199 | c  |
| 11.22482256300841 | 2.20349039394823   | -10.12831287033947 | c  |
| 11.33281237313370 | -1.35990230625011  | -12.71233586404199 | c  |
| 11.16085342185883 | 0.00000000000000   | -8.53448734422962  | c  |
| 11.22482256300841 | -2.20349039394823  | -10.12831287033947 | c  |
| -4.48869624268915 | -10.49445456458141 | -12.71233586404199 | c  |
| -3.70413262335015 | -10.82272668951213 | -10.12831287033947 | c  |
| -6.84411613044444 | -9.13455225833130  | -12.71233586404199 | c  |
| -5.58042671092942 | -9.66558259124423  | -8.53448734422962  | c  |
| -7.52068993965832 | -8.61923629556399  | -10.12831287033947 | c  |
| -6.84411613044444 | 9.13455225833130   | -12.71233586404199 | c  |
| -7.52068993965832 | 8.61923629556399   | -10.12831287033947 | c  |
| -4.48869624268915 | 10.49445456458141  | -12.71233586404199 | c  |
| -5.58042671092942 | 9.66558259124423   | -8.53448734422962  | c  |
| -3.70413262335015 | 10.82272668951213  | -10.12831287033947 | c  |
| -6.84411613044444 | -9.13455225833130  | 12.71233586404199  | c  |
| -7.52068993965832 | -8.61923629556399  | 10.12831287033947  | c  |
| -4.48869624268915 | -10.49445456458141 | 12.71233586404199  | c  |
| -5.58042671092942 | -9.66558259124423  | 8.53448734422962   | c  |
| -3.70413262335015 | -10.82272668951213 | 10.12831287033947  | c  |
| -4.48869624268915 | 10.49445456458141  | 12.71233586404199  | c  |
| -3.70413262335015 | 10.82272668951213  | 10.12831287033947  | c  |
| -6.84411613044444 | 9.13455225833130   | 12.71233586404199  | c  |
| -5.58042671092942 | 9.66558259124423   | 8.53448734422962   | c  |
| -7.52068993965832 | 8.61923629556399   | 10.12831287033947  | c  |
| 11.33281237313370 | -1.35990230625011  | 12.71233586404199  | c  |
| 11.22482256300841 | -2.20349039394823  | 10.12831287033947  | c  |
| 11.33281237313370 | 1.35990230625011   | 12.71233586404199  | c  |
| 11.16085342185883 | 0.00000000000000   | 8.53448734422962   | c  |
| 11.22482256300841 | 2.20349039394823   | 10.12831287033947  | c  |
| -4.07529376672746 | 7.05861585974070   | 10.95321792068200  | fe |
| -4.07529376672746 | -7.05861585974070  | 10.95321792068200  | fe |
| 8.15058753345483  | 0.00000000000000   | 10.95321792068200  | fe |
| -4.07529376672746 | -7.05861585974070  | -10.95321792068200 | fe |
| -4.07529376672746 | 7.05861585974070   | -10.95321792068200 | fe |
| 8.15058753345483  | 0.00000000000000   | -10.95321792068200 | fe |
| -9.20514677756585 | 7.59132180388388   | -9.48618918265481  | h  |
| 2.22745632982642  | 8.52906165801113   | -4.11459259159298  | h  |
| 2.22745632982642  | 8.52906165801113   | 4.11459259159298   | h  |
| 6.27265590136827  | 6.19356459645573   | -4.11459259159298  | h  |
| 6.27265590136827  | 6.19356459645573   | 4.11459259159298   | h  |
| 6.27265590136827  | -6.19356459645573  | -4.11459259159298  | h  |
| 6.27265590136827  | -6.19356459645573  | 4.11459259159298   | h  |
| 2.22745632982642  | -8.52906165801113  | -4.11459259159298  | h  |
| 2.22745632982642  | -8.52906165801113  | 4.11459259159298   | h  |
| -8.50011223119468 | -2.33549706155542  | -4.11459259159298  | h  |
| -8.50011223119468 | -2.33549706155542  | 4.11459259159298   | h  |
| -8.50011223119468 | 2.33549706155542   | -4.11459259159298  | h  |
| -8.50011223119468 | 2.33549706155542   | 4.11459259159298   | h  |

|                    |                    |                   |   |
|--------------------|--------------------|-------------------|---|
| 13.71046231174857  | -2.31021306084320  | 3.09949933150555  | h |
| 9.80578553364025   | -9.53739869736290  | 2.65779590106732  | h |
| 16.65070629056769  | -4.10795880336435  | 6.33966496874439  | h |
| 12.71995810566698  | -11.30510616062054 | 5.90357469860808  | h |
| 16.17115741345484  | -8.61620699276808  | 7.74290411682394  | h |
| 13.71046231174857  | 2.31021306084320   | 3.09949933150555  | h |
| 9.80578553364025   | 9.53739869736290   | 2.65779590106732  | h |
| 16.65070629056769  | 4.10795880336435   | 6.33966496874439  | h |
| 12.71995810566698  | 11.30510616062054  | 5.90357469860808  | h |
| 16.17115741345484  | 8.61620699276808   | 7.74290411682394  | h |
| -4.85452795702950  | 13.02871519002501  | 3.09949933150555  | h |
| 3.35673679111673   | 13.26075872487585  | 2.65779590106732  | h |
| -4.76775646387036  | 16.47391404026716  | 6.33966496874439  | h |
| 3.43053007474386   | 16.66835993489163  | 5.90357469860808  | h |
| -0.62372456672516  | 18.31273662503296  | 7.74290411682394  | h |
| -8.85593435471914  | 10.71850212918182  | 3.09949933150555  | h |
| -13.16252232475703 | 3.72336002751297   | 2.65779590106732  | h |
| -11.88294982669731 | 12.36595523690273  | 6.33966496874439  | h |
| -16.15048818041079 | 5.36325377427117   | 5.90357469860808  | h |
| -15.54743284672973 | 9.69652963226489   | 7.74290411682394  | h |
| -8.85593435471914  | -10.71850212918182 | 3.09949933150555  | h |
| -13.16252232475703 | -3.72336002751297  | 2.65779590106732  | h |
| -11.88294982669731 | -12.36595523690273 | 6.33966496874439  | h |
| -16.15048818041079 | -5.36325377427117  | 5.90357469860808  | h |
| -15.54743284672973 | -9.69652963226489  | 7.74290411682394  | h |
| -4.85452795702950  | -13.02871519002501 | 3.09949933150555  | h |
| 3.35673679111673   | -13.26075872487585 | 2.65779590106732  | h |
| -4.76775646387036  | -16.47391404026716 | 6.33966496874439  | h |
| 3.43053007474386   | -16.66835993489163 | 5.90357469860808  | h |
| -0.62372456672516  | -18.31273662503296 | 7.74290411682394  | h |
| 13.71046231174857  | -2.31021306084320  | -3.09949933150555 | h |
| 9.80578553364025   | -9.53739869736290  | -2.65779590106732 | h |
| 16.65070629056769  | -4.10795880336435  | -6.33966496874439 | h |
| 12.71995810566698  | -11.30510616062054 | -5.90357469860808 | h |
| 16.17115741345484  | -8.61620699276808  | -7.74290411682394 | h |
| -4.85452795702950  | -13.02871519002501 | -3.09949933150555 | h |
| 3.35673679111673   | -13.26075872487585 | -2.65779590106732 | h |
| -4.76775646387036  | -16.47391404026716 | -6.33966496874439 | h |
| 3.43053007474386   | -16.66835993489163 | -5.90357469860808 | h |
| -0.62372456672516  | -18.31273662503296 | -7.74290411682394 | h |
| -8.85593435471914  | -10.71850212918182 | -3.09949933150555 | h |
| -13.16252232475703 | -3.72336002751297  | -2.65779590106732 | h |
| -11.88294982669731 | -12.36595523690273 | -6.33966496874439 | h |
| -16.15048818041079 | -5.36325377427117  | -5.90357469860808 | h |
| -15.54743284672973 | -9.69652963226489  | -7.74290411682394 | h |
| -13.16252232475703 | 3.72336002751297   | -2.65779590106732 | h |
| -8.85593435471914  | 10.71850212918182  | -3.09949933150555 | h |
| -16.15048818041079 | 5.36325377427117   | -5.90357469860808 | h |
| -11.88294982669731 | 12.36595523690273  | -6.33966496874439 | h |
| -15.54743284672973 | 9.69652963226489   | -7.74290411682394 | h |
| 3.35673679111673   | 13.26075872487585  | -2.65779590106732 | h |
| -4.85452795702950  | 13.02871519002501  | -3.09949933150555 | h |
| 3.43053007474386   | 16.66835993489163  | -5.90357469860808 | h |
| -4.76775646387036  | 16.47391404026716  | -6.33966496874439 | h |
| -0.62372456672516  | 18.31273662503296  | -7.74290411682394 | h |
| 13.71046231174857  | 2.31021306084320   | -3.09949933150555 | h |
| 9.80578553364025   | 9.53739869736290   | -2.65779590106732 | h |
| 16.65070629056769  | 4.10795880336435   | -6.33966496874439 | h |
| 12.71995810566698  | 11.30510616062054  | -5.90357469860808 | h |
| 16.17115741345484  | 8.61620699276808   | -7.74290411682394 | h |
| 5.02435897811632   | -4.17119281840230  | 9.78240703889996  | h |
| 5.02435897811632   | 4.17119281840230   | 9.78240703889996  | h |
| 5.29992108538289   | -2.57590275146193  | 14.68861494766916 | h |
| 5.29992108538289   | 2.57590275146193   | 14.68861494766916 | h |

|                   |                    |                    |   |
|-------------------|--------------------|--------------------|---|
| 5.02435897811632  | 4.17119281840230   | -9.78240703889996  | h |
| 5.02435897811632  | -4.17119281840230  | -9.78240703889996  | h |
| 5.29992108538289  | 2.57590275146193   | -14.68861494766916 | h |
| 5.29992108538289  | -2.57590275146193  | -14.68861494766916 | h |
| 1.10017945576149  | -6.43681892198232  | -9.78240703889996  | h |
| -6.12453843387777 | -2.26562610357996  | -9.78240703889996  | h |
| -0.41916332224720 | -5.87781767372535  | -14.68861494766916 | h |
| -4.88075776313576 | -3.30191492226340  | -14.68861494766916 | h |
| -6.12453843387777 | 2.26562610357996   | -9.78240703889996  | h |
| 1.10017945576149  | 6.43681892198232   | -9.78240703889996  | h |
| -4.88075776313576 | 3.30191492226340   | -14.68861494766916 | h |
| -0.41916332224720 | 5.87781767372535   | -14.68861494766916 | h |
| -6.12453843387777 | -2.26562610357996  | 9.78240703889996   | h |
| 1.10017945576149  | -6.43681892198232  | 9.78240703889996   | h |
| -4.88075776313576 | -3.30191492226340  | 14.68861494766916  | h |
| -0.41916332224720 | -5.87781767372535  | 14.68861494766916  | h |
| 1.10017945576149  | 6.43681892198232   | 9.78240703889996   | h |
| -6.12453843387777 | 2.26562610357996   | 9.78240703889996   | h |
| -0.41916332224720 | 5.87781767372535   | 14.68861494766916  | h |
| -4.88075776313576 | 3.30191492226340   | 14.68861494766916  | h |
| 11.37503275498512 | 2.57628855685800   | -14.39489770094270 | h |
| 11.37503275498512 | -2.57628855685800  | -14.39489770094270 | h |
| 11.17685091924904 | -4.17623005299455  | -9.48618918265481  | h |
| -3.45638503977436 | -11.13921161312624 | -14.39489770094270 | h |
| -7.91864771521074 | -8.56292305626823  | -14.39489770094270 | h |
| -9.20514677756585 | -7.59132180388388  | -9.48618918265481  | h |
| -7.91864771521074 | 8.56292305626823   | -14.39489770094270 | h |
| -3.45638503977436 | 11.13921161312624  | -14.39489770094270 | h |
| -1.97170414168329 | 11.76755185687840  | -9.48618918265481  | h |
| -7.91864771521074 | -8.56292305626823  | 14.39489770094270  | h |
| -3.45638503977436 | -11.13921161312624 | 14.39489770094270  | h |
| -1.97170414168329 | -11.76755185687840 | 9.48618918265481   | h |
| -3.45638503977436 | 11.13921161312624  | 14.39489770094270  | h |
| -7.91864771521074 | 8.56292305626823   | 14.39489770094270  | h |
| -9.20514677756585 | 7.59132180388388   | 9.48618918265481   | h |
| 11.37503275498512 | -2.57628855685800  | 14.39489770094270  | h |
| 11.37503275498512 | 2.57628855685800   | 14.39489770094270  | h |
| 11.17685091924904 | 4.17623005299455   | 9.48618918265481   | h |
| 11.17685091924904 | -4.17623005299455  | 9.48618918265481   | h |
| -1.97170414168329 | 11.76755185687840  | 9.48618918265481   | h |
| -9.20514677756585 | -7.59132180388388  | 9.48618918265481   | h |
| 11.17685091924904 | 4.17623005299455   | -9.48618918265481  | h |
| -1.97170414168329 | -11.76755185687840 | -9.48618918265481  | h |
| -5.48942933658282 | -9.50797051552048  | 6.46598291882716   | h |
| -5.48942933658282 | 9.50797051552048   | 6.46598291882716   | h |
| 10.97885867316561 | 0.00000000000000   | 6.46598291882716   | h |
| -5.48942933658282 | -9.50797051552048  | -6.46598291882716  | h |
| 10.97885867316561 | 0.00000000000000   | -6.46598291882716  | h |
| -5.48942933658282 | 9.50797051552048   | -6.46598291882716  | h |

**[{Au<sub>3</sub>Cu<sub>2</sub>(C<sub>2</sub>C<sub>6</sub>H<sub>4</sub>Fe)<sub>6</sub>}Au<sub>3</sub>(PPh<sub>2</sub>C<sub>6</sub>H<sub>4</sub>PPh<sub>2</sub>)<sub>3</sub>]<sup>2+</sup> (4), C<sub>1</sub>-symmetry**

|                    |                   |                    |    |
|--------------------|-------------------|--------------------|----|
| -2.41595586048594  | 2.98969180007775  | -0.26053809124009  | au |
| -5.84737518391877  | 7.19612876018849  | 0.22723142601349   | au |
| 0.00209433782253   | 0.35707819369921  | 3.74568927838225   | cu |
| 0.01728032808449   | 0.05895712475037  | -3.89569657518239  | cu |
| -4.93054647642222  | 9.26132245702055  | -18.69929165919989 | fe |
| -9.79378694084884  | 3.13239352049285  | 18.00894478237846  | fe |
| -9.55154537736194  | 4.68527165789457  | -0.18419965377063  | p  |
| -7.24729048694013  | -7.40194502638278 | 0.94154465856464   | p  |
| -10.96468109790055 | 5.15814793578112  | -3.33304604523760  | c  |
| -9.32993581283531  | 5.38106886862380  | -5.43550777354729  | c  |
| -7.26130428895571  | 5.27553141407839  | -5.18042900207133  | h  |

|                    |                    |                    |   |
|--------------------|--------------------|--------------------|---|
| -10.33485525197753 | 5.72437972158962   | -7.86903700447257  | c |
| -9.04119895214155  | 5.87798804906740   | -9.49454662082982  | h |
| -12.96367656112214 | 5.88327542496505   | -8.21812687676968  | c |
| -13.74910256338385 | 6.17342803729317   | -10.12587494631078 | h |
| -14.59142272497383 | 5.69005912538266   | -6.12798014330610  | c |
| -16.65332568004499 | 5.83378140288762   | -6.38920353767353  | h |
| -13.60338635757140 | 5.32212989696476   | -3.69104993504400  | c |
| -14.89993793505359 | 5.18707928936404   | -2.06799201763140  | h |
| -12.01240046158768 | 5.49311447150676   | 2.13222207841509   | c |
| -11.95646310738929 | 7.89904347877977   | 3.28726579704992   | c |
| -10.38877931177530 | 9.20923432013339   | 2.86435929154298   | h |
| -13.87894362344616 | 8.62029948405850   | 4.97047186214056   | c |
| -13.81924770104103 | 10.50289546413878  | 5.85967650996544   | h |
| -15.86326065817929 | 6.94347284807944   | 5.52254517761424   | c |
| -17.37011136008316 | 7.50910395052870   | 6.84531630269821   | h |
| -15.92267694046459 | 4.53934530152010   | 4.39092163867448   | c |
| -17.47383248553099 | 3.21798752370949   | 4.82443406161159   | h |
| -14.00993926530856 | 3.81068594143368   | 2.70102747718787   | c |
| -14.07261434642452 | 1.91996789183207   | 1.82922706347329   | h |
| -9.05672336989995  | 1.23548272584792   | 0.13848749434711   | c |
| -8.90034362911606  | 0.12226876255541   | 2.55861117608592   | c |
| -9.16477990748286  | 1.27188042869822   | 4.27358955763267   | h |
| -8.13449408972302  | -2.87826523940710  | -1.74198210453341  | c |
| -7.79783439038966  | -4.01786429058597  | -3.45019927719508  | h |
| -8.03389227348029  | -4.00424681287339  | 0.67494013329519   | c |
| -8.41444668845569  | -2.47395366430858  | 2.82373491677783   | c |
| -8.32566989352532  | -3.29538692407832  | 4.73384445147567   | h |
| -8.65923790283570  | -0.29389489716296  | -2.01017169096498  | c |
| -8.74030993910388  | 0.52445876210404   | -3.92124157361568  | h |
| -9.32886340601589  | -8.99676435115188  | -1.33966899939103  | c |
| -11.78402159591343 | -8.08408011321721  | -1.87001379149168  | c |
| -12.46429513935442 | -6.32416624328828  | -0.98778919792599  | h |
| -13.36591366363830 | -9.41472229207979  | -3.53529746790213  | c |
| -15.27761358018876 | -8.69221324884488  | -3.94003379366255  | h |
| -12.51802441870575 | -11.65841107574889 | -4.68015370412109  | c |
| -13.76615826724541 | -12.69802507746157 | -5.98459794494678  | h |
| -10.07616770410183 | -12.56823184987362 | -4.16710332879815  | c |
| -9.39782902562558  | -14.31792455650656 | -5.07068062527216  | h |
| -8.48307422662734  | -11.24204426000993 | -2.50884242861305  | c |
| -6.55701044332019  | -11.94453058148252 | -2.12290237167271  | h |
| -8.31095016355555  | -8.39099010176334  | 4.10557036571014   | c |
| -10.72331852907798 | -9.45382784463748  | 4.51699602762627   | c |
| -12.03761955594094 | -9.73355076588018  | 2.92696901733510   | h |
| -11.44958885054975 | -10.19040038940945 | 6.96235868265424   | c |
| -13.33169440941856 | -11.03013902801318 | 7.26632063501290   | h |
| -9.78421133462455  | -9.86971254342545  | 9.00664259275986   | c |
| -10.36126618267996 | -10.45630595499821 | 10.92071631957683  | h |
| -7.37819271803737  | -8.81732421724259  | 8.60356438356936   | c |
| -6.05390068358675  | -8.56631005631332  | 10.19184391382236  | h |
| -6.63155372252512  | -8.08980001419828  | 6.16179955566569   | c |
| -4.73219113662391  | -7.27956687566190  | 5.85846399212690   | h |
| -2.88369366813673  | 2.95998168024308   | 3.53296947340689   | c |
| -3.50108064193040  | 3.19543295280524   | 5.81026817785947   | c |
| -6.89934165005821  | 4.86222569259144   | 16.04655360815236  | c |
| -5.96757352930653  | 3.64334068869942   | 18.31683586427071  | c |
| -4.54531291846917  | 2.13342376160391   | 18.39153979564603  | h |
| -7.24144159073058  | 4.71484064216217   | 20.46086146528259  | c |
| -6.95568698307237  | 4.17150051043216   | 22.44426555467962  | h |
| -8.98540982000347  | 6.59063202234946   | 19.55269252430120  | c |
| -10.25989949766755 | 7.74275375837281   | 20.71871453437022  | h |
| -8.80194682205224  | 6.67037228177221   | 16.84554313512784  | c |
| -9.88160457383585  | 7.93445876122134   | 15.60224997828727  | h |
| -11.40271369601010 | 0.48261777964077   | 15.67063635292015  | c |
| -10.80246945941694 | 0.07986735788648   | 13.72306498488863  | h |

|                    |                    |                    |    |
|--------------------|--------------------|--------------------|----|
| -13.24397363410472 | 2.33745451676396   | 16.42226226925782  | c  |
| -14.32363073021386 | 3.57608781507577   | 15.15205123803771  | h  |
| -13.41099515782828 | 2.30352546165196   | 19.13773244238056  | c  |
| -14.63157379164567 | 3.51430418406741   | 20.30226512951916  | h  |
| -11.67142583196585 | 0.42910417619916   | 20.06265133971651  | c  |
| -11.33138791599684 | -0.03918895228089  | 22.05690270007420  | h  |
| -10.42828939502960 | -0.69499938037958  | 17.91931399548915  | c  |
| -8.97467233662062  | -2.17609733330060  | 17.99338649450264  | h  |
| -2.20437970871271  | 3.28823647909596   | -4.06422977153725  | c  |
| -2.35014033948466  | 3.89827720800944   | -6.34978547244734  | c  |
| -2.66852816155345  | 6.63639489396891   | -16.91027338486921 | c  |
| -1.17756413520213  | 8.59094853608191   | -18.13257464052898 | c  |
| 0.18708277098101   | 9.85027562101868   | -17.20543799876538 | h  |
| -1.74062364990728  | 8.57508527842800   | -20.78755034545335 | c  |
| -0.91383315772985  | 9.83863259879451   | -22.21262977916546 | h  |
| -3.60521408902539  | 6.65186242150537   | -21.24217680827521 | c  |
| -4.46220615085003  | 6.18897680458592   | -23.07570147975216 | h  |
| -4.19195567567457  | 5.47062470801959   | -18.87068125960354 | c  |
| -5.57657971017436  | 3.94833938678915   | -18.60281101184368 | h  |
| -7.24046519589004  | 10.87030241511164  | -16.02114167532121 | c  |
| -7.23616791808711  | 10.40065578998874  | -13.99738960088737 | h  |
| -5.70440207949491  | 12.76655979876320  | -17.21984841996907 | c  |
| -4.34920632739315  | 14.02297128867959  | -16.27251640145206 | h  |
| -6.23916705027142  | 12.71593005875590  | -19.88685842913941 | c  |
| -5.36088410499949  | 13.92057730191231  | -21.33243941203609 | h  |
| -8.10228332656352  | 10.78656923296280  | -20.33371299422877 | c  |
| -8.89314607462926  | 10.26029333334771  | -22.18025834669378 | h  |
| -8.71963396430391  | 9.64282154355258   | -17.94385954157271 | c  |
| -10.06899228708583 | 8.09214718415896   | -17.64832103520545 | h  |
| -1.08664363703898  | -3.32069862305325  | 0.12498059111622   | au |
| -2.92115522630220  | -8.43833869249327  | 0.34969445036663   | au |
| -5.17010550281480  | -9.03026232528763  | -18.30572242468884 | fe |
| 0.38049853017358   | -10.73366946576159 | 18.19269212147798  | fe |
| 1.06556526540578   | -10.42049663343876 | -0.23405632044688  | p  |
| 10.33092898155000  | -2.30875332206786  | 0.76582983966272   | p  |
| 1.26342324853749   | -11.83670892883713 | -3.41116301677681  | c  |
| 0.23636797154321   | -10.47494791831137 | -5.46826582968768  | c  |
| -0.67353522790472  | -8.62292153721948  | -5.15946895598366  | h  |
| 0.37727972446817   | -11.47141898170497 | -7.92504577915127  | c  |
| -0.41331075727062  | -10.38038709091048 | -9.51388203146295  | h  |
| 1.50117347144442   | -13.84206738803501 | -8.34263430865263  | c  |
| 1.59129906851067   | -14.63176358805675 | -10.26843877039751 | h  |
| 2.49079609672884   | -15.21621034418926 | -6.29612369785730  | c  |
| 3.35322759615330   | -17.08657331980040 | -6.60943774451343  | h  |
| 2.38110914061535   | -14.22191323033222 | -3.83645043446564  | c  |
| 3.15024052584631   | -15.32700402771461 | -2.24913179510529  | h  |
| 1.66903013778748   | -12.97785514584243 | 2.03670186778690   | c  |
| -0.39190386498299  | -14.06858393309271 | 3.33460320387835   | c  |
| -2.31314560306099  | -13.31085729860925 | 3.03973406552879   | h  |
| -0.00148016965967  | -16.09881638166917 | 5.00026218866956   | c  |
| -1.62213611112664  | -16.93419348515703 | 6.00694752539908   | h  |
| 2.44678796405226   | -17.05096558336893 | 5.38778000367167   | c  |
| 2.75215489380077   | -18.64198204166929 | 6.69756071486113   | h  |
| 4.51003536187890   | -15.96732161618780 | 4.10943610948069   | c  |
| 6.43359879602489   | -16.70781857782399 | 4.41271650937279   | h  |
| 4.13080484244944   | -13.94036485574296 | 2.43884261611010   | c  |
| 5.76235788545573   | -13.10267131414082 | 1.45085956257167   | h  |
| 3.80997064790227   | -8.26319561198371  | 0.03226272544006   | c  |
| 4.84567094122623   | -7.71265048632506  | 2.42714446389346   | c  |
| 4.10738134102043   | -8.65699214104122  | 4.12868796138397   | h  |
| 6.73832034644017   | -5.23419340174937  | -1.85364458228326  | c  |
| 7.42746516502477   | -4.24192123890447  | -3.54875538536252  | h  |
| 7.80253739512798   | -4.71391317203175  | 0.53772005361688   | c  |
| 6.83342159609027   | -5.97066451562451  | 2.67765153149895   | c  |

|                   |                    |                    |   |
|-------------------|--------------------|--------------------|---|
| 7.61956506999858  | -5.59014679685925  | 4.56690410066659   | h |
| 4.77679311828301  | -6.99851263283036  | -2.10840527966559  | c |
| 3.98982220293875  | -7.36351227598520  | -3.99944436236747  | h |
| 12.77431236737054 | -3.36833951460109  | -1.46594200497331  | c |
| 13.21298147658905 | -5.96505256163521  | -1.91730386586784  | c |
| 12.02659162435776 | -7.40647705484347  | -0.99326346497334  | h |
| 15.16107142713983 | -6.71798146641277  | -3.55533889429464  | c |
| 15.49387364704270 | -8.74566354532725  | -3.89913005540842  | h |
| 16.68103098903932 | -4.89545645502072  | -4.75220810501678  | c |
| 18.20837046171919 | -5.49403047259915  | -6.03638231686202  | h |
| 16.24522818703951 | -2.31176734532579  | -4.31794977787131  | c |
| 17.42143478401251 | -0.87687275143677  | -5.26434579390577  | h |
| 14.29606368608614 | -1.54689057241209  | -2.68624638736569  | c |
| 13.93710948506621 | 0.48250776838024   | -2.36340014792534  | h |
| 11.68492694165630 | -2.63572908320893  | 3.95465778821020   | c |
| 13.93060528596760 | -4.00218507847288  | 4.40818149945353   | c |
| 14.94117914959097 | -4.92053787959137  | 2.83662104099193   | h |
| 14.90213326974055 | -4.17481657555035  | 6.87404685434028   | c |
| 16.66506471298702 | -5.23224242316193  | 7.21185514443288   | h |
| 13.64157877996769 | -2.99929327728597  | 8.89480651251550   | c |
| 14.41531138242416 | -3.13592012354649  | 10.82445658492193  | h |
| 11.40519430170461 | -1.63431065675148  | 8.44908821874721   | c |
| 10.40661991706379 | -0.69724811064471  | 10.01918657150868  | h |
| 10.43150021268658 | -1.43542176913159  | 5.98765002576133   | c |
| 8.68542952913685  | -0.34236609933470  | 5.65118883380825   | h |
| -0.64730181058003 | -3.49694366850265  | 3.92432782289727   | c |
| -0.44748155966539 | -4.16670091027770  | 6.18937910932137   | c |
| 0.78418273237202  | -7.19290632256364  | 16.60832414252331  | c |
| 3.10984142234486  | -8.04269807215737  | 17.79334304671151  | c |
| 4.95067852977728  | -8.25875757894580  | 16.85905642018351  | h |
| 2.62338730332086  | -8.49801686699460  | 20.42450533501575  | c |
| 4.01091772891004  | -9.15909827214462  | 21.82034750667461  | h |
| -0.00202043945381 | -7.98324534031428  | 20.89861767381183  | c |
| -0.97804406510078 | -8.19060623823941  | 22.71921977245216  | h |
| -1.13976894734177 | -7.19864179364873  | 18.56268405267535  | c |
| -3.14132283395092 | -6.71247824631535  | 18.30886800279493  | h |
| -0.61117046715469 | -13.20639626490955 | 15.36373881468264  | c |
| -0.86427752858065 | -12.70091616210162 | 13.36473431820179  | h |
| -2.53294299647231 | -13.13637029119342 | 17.28544035145808  | c |
| -4.52068780920169 | -12.60191875907450 | 17.01063959476563  | h |
| -1.38944391090817 | -13.86901278481241 | 19.64248828021881  | c |
| -2.34780899546096 | -13.98615120389940 | 21.48092046764634  | h |
| 1.23879102453859  | -14.38726746118637 | 19.17680764906826  | c |
| 2.63691416444322  | -14.96989387007616 | 20.59733183293989  | h |
| 1.72105856874400  | -13.97544048980171 | 16.53113033682366  | c |
| 3.55322837607488  | -14.19590162208523 | 15.57849712203252  | h |
| -1.64058302953784 | -3.46965888639626  | -3.65165877658850  | c |
| -2.17054564534898 | -3.88256212616252  | -5.92619869535837  | c |
| -4.94674875525523 | -5.67218242671801  | -16.33251761857634 | c |
| -7.48057832726974 | -6.11479177067805  | -17.29174485385672 | c |
| -9.21536678477537 | -6.23939467045427  | -16.15957867421262 | h |
| -7.36017657667195 | -6.31760251422622  | -19.99537887891449 | c |
| -8.97038352852629 | -6.65703969921188  | -21.26138249148154 | h |
| -4.76302103393523 | -6.04495604027420  | -20.74544593748105 | c |
| -4.03346141766369 | -6.14564124761775  | -22.68661408976218 | h |
| -3.27491959251781 | -5.66867399442626  | -18.50753756614451 | c |
| -1.21434831394342 | -5.42658536315081  | -18.46945579789024 | h |
| -4.19776648337000 | -11.90372174326747 | -15.88144760975405 | c |
| -3.68328583799775 | -11.65886284038431 | -13.88362203710244 | h |
| -6.71353457531113 | -12.27867340139975 | -16.84182253421855 | c |
| -8.44951486929831 | -12.40892499900543 | -15.70960816359274 | h |
| -6.56054857098586 | -12.43296806216655 | -19.55359369370852 | c |
| -8.15805737063979 | -12.69420560738414 | -20.85428824134583 | h |
| -3.95169840219952 | -12.14992387019010 | -20.26594842300537 | c |

|                   |                    |                    |    |
|-------------------|--------------------|--------------------|----|
| -3.21060176187721 | -12.15630736915937 | -22.20576254169905 | h  |
| -2.48958713646306 | -11.81944761488224 | -17.99547869524492 | c  |
| -0.43501673671828 | -11.53232043639353 | -17.90045832890943 | h  |
| 3.69359193876708  | 0.99142359144916   | -0.14566896546759  | au |
| 9.05026324519250  | 1.93163129182745   | 0.05807210432079   | au |
| 10.06726029498621 | -0.58385223473770  | -18.71928058125171 | fe |
| 8.86489113344024  | 5.35016454141813   | 18.33460595396081  | fe |
| 8.79172920314448  | 6.36058412369703   | -0.62893055147250  | p  |
| -2.79602384519731 | 10.45536396295216  | 0.63750642273181   | p  |
| 9.82434062084758  | 7.13677769036106   | -3.86616209458274  | c  |
| 9.10320655647615  | 5.49864250464748   | -5.85066855191825  | c  |
| 7.96651790227608  | 3.79455170835672   | -5.45315869815413  | h  |
| 9.82828346655049  | 6.03474116028232   | -8.34797838933652  | c  |
| 9.23720948801777  | 4.75087665772291   | -9.87838152863124  | h  |
| 11.30581787500040 | 8.17744643889299   | -8.87899532476706  | c  |
| 11.89125298538392 | 8.58524895894985   | -10.83639579647094 | h  |
| 12.05663802644837 | 9.78891582574459   | -6.90560637413523  | c  |
| 13.23585021177985 | 11.45871108529530  | -7.30764533146942  | h  |
| 11.32011077556761 | 9.27934407340423   | -4.40602677854773  | c  |
| 11.94173352083545 | 10.54759614512972  | -2.87728972905725  | h  |
| 10.79313321063351 | 8.20343843026192   | 1.52924255795252   | c  |
| 12.76557533223806 | 6.97037377015432   | 2.83694692703714   | c  |
| 13.01444035611358 | 4.91040623403615   | 2.62111530637007   | h  |
| 14.39395294287684 | 8.35139184808332   | 4.41501441445655   | c  |
| 15.92553200781035 | 7.37013773048970   | 5.42947445225365   | h  |
| 14.06190037351726 | 10.96954966332600  | 4.70619741652086   | c  |
| 15.33846902702184 | 12.05178890806004  | 5.94679116325423   | h  |
| 12.09287147411458 | 12.20878128494446  | 3.42052455295769   | c  |
| 11.82388687645902 | 14.26190669157130  | 3.64992186018821   | h  |
| 10.46142267830464 | 10.83884306133682  | 1.83802665142524   | c  |
| 8.91843960686282  | 11.82853824573889  | 0.84860358795475   | h  |
| 5.57233109364507  | 7.69344185713452   | -0.29195809337686  | c  |
| 4.69011304304389  | 8.48464642938941   | 2.09648510847491   | c  |
| 5.95165634194293  | 8.43251858291864   | 3.75113806119645   | h  |
| 1.40100504102673  | 8.59417875086851   | -2.05524180909374  | c  |
| 0.11906961067430  | 8.57338269121327   | -3.69541779283547  | h  |
| 0.53343769611984  | 9.43096224699452   | 0.32620716246764   | c  |
| 2.20316491495550  | 9.36424635553272   | 2.40054197889658   | c  |
| 1.57207807342041  | 9.99183314745513   | 4.28194225411824   | h  |
| 3.89483989270436  | 7.75175741874305   | -2.36622623069680  | c  |
| 4.51401896429417  | 7.11523664659738   | -4.24784054833915  | h  |
| -3.18638193765241 | 12.96191989908372  | -1.73644246280765  | c  |
| -1.17219563810530 | 14.60035063906601  | -2.36631612179351  | c  |
| 0.70210969196443  | 14.34313527518396  | -1.49448206443984  | h  |
| -1.55269879071936 | 16.56171870569624  | -4.11355804475286  | c  |
| 0.02554593053425  | 17.83260705939102  | -4.59782483186321  | h  |
| -3.93512345324282 | 16.90485065716006  | -5.24081893668910  | c  |
| -4.22621419686868 | 18.44664884917842  | -6.61136294722113  | h  |
| -5.94087480109319 | 15.27582089174308  | -4.62671280433185  | c  |
| -7.80692254378453 | 15.52919628395428  | -5.51645696535801  | h  |
| -5.57016819908741 | 13.30654473579976  | -2.88568248863825  | c  |
| -7.13847972601470 | 12.01207109592749  | -2.42016924209753  | h  |
| -3.03902815698992 | 11.98682628348453  | 3.75141554117513   | c  |
| -3.00326299637180 | 14.63890607052610  | 4.03603202515759   | c  |
| -2.83411820376963 | 15.87630369575871  | 2.37039105109987   | h  |
| -3.20550565179801 | 15.71331426863029  | 6.45668369826826   | c  |
| -3.18876426043192 | 17.78622746873587  | 6.66451798855053   | h  |
| -3.43527721245310 | 14.158495229812951 | 8.59789582193823   | c  |
| -3.59655507921125 | 15.01143112325698  | 10.49195152994222  | h  |
| -3.47661871941860 | 11.51561826011641  | 8.32039752521878   | c  |
| -3.67112018258242 | 10.28061767865259  | 9.98605715315254   | h  |
| -3.29519866496920 | 10.42729318243901  | 5.90665014496216   | c  |
| -3.35007788220792 | 8.35144734954545   | 5.70362912933408   | h  |
| 3.73717682467442  | 1.56515755904053   | 3.62647419932394   | c  |

|                   |                   |                    |   |
|-------------------|-------------------|--------------------|---|
| 4.08252350904961  | 2.04291815769773  | 5.92281249438242   | c |
| 5.56762018706132  | 4.40975533869785  | 16.47623162880684  | c |
| 5.40338563984195  | 6.89466445788244  | 17.62996407191439  | c |
| 5.00409095885599  | 8.67735910476114  | 16.64534900734834  | h |
| 5.78309687826837  | 6.63330850545281  | 20.30387800178113  | c |
| 5.76885480395621  | 8.17930162452846  | 21.68950996416286  | h |
| 6.22730031862213  | 4.00724535672104  | 20.84025479694365  | c |
| 6.62218609407306  | 3.19111581365162  | 22.70793293063615  | h |
| 6.11375220395250  | 2.63974201279507  | 18.49906339773908  | c |
| 6.40809373886037  | 0.59591222492090  | 18.29149169807398  | h |
| 11.75251859754514 | 5.32063701040484  | 15.73517220442143  | c |
| 11.54124848269722 | 4.88909114939387  | 13.71401388697985  | h |
| 12.23120707696514 | 3.51821554459640  | 17.71362687200154  | c |
| 12.48374653055858 | 1.47113919128492  | 17.47176413379306  | h |
| 12.29832276247821 | 4.86476814590035  | 20.07660031553148  | c |
| 12.60495251031381 | 4.02702689644840  | 21.95171339413367  | h |
| 11.85678900108236 | 7.49711286969512  | 19.55724861037356  | c |
| 11.76831142682216 | 9.01971309696198  | 20.96642821391386  | h |
| 11.51693774305776 | 7.77902575828405  | 16.87266875946808  | c |
| 11.12994137575479 | 9.55807086211561  | 15.87379936447558  | h |
| 3.91426010154957  | 0.46841490466920  | -3.92508066952065  | c |
| 4.458744451290513 | 0.17418729093482  | -6.21386984712103  | c |
| 6.80744871571193  | -1.43238653047115 | -16.75380128973198 | c |
| 7.94354348082139  | -3.67996247330516 | -17.84702813518249 | c |
| 8.56628093697108  | -5.36599067324627 | -16.80928152108993 | h |
| 8.07225429875361  | -3.36218505556100 | -20.53925530071233 | c |
| 8.84180112404283  | -4.73865884053593 | -21.88983392848739 | h |
| 7.06314726063928  | -0.91399603352597 | -21.14830205600531 | c |
| 6.93085615884584  | -0.08344842260207 | -23.04636062556792 | h |
| 6.30224617681337  | 0.28251853817670  | -18.83449583149907 | c |
| 5.48398632602152  | 2.18360794471804  | -18.68488413910910 | h |
| 12.56752869701223 | 1.05063820767561  | -16.23539064213521 | c |
| 12.20507937370268 | 1.38388332442120  | -14.21714489762946 | h |
| 13.63104439023843 | -1.20881998450641 | -17.31017226163992 | c |
| 14.25614469587044 | -2.88744771732597 | -16.25945434272847 | h |
| 13.71374930794756 | -0.89361168059774 | -20.01104943146842 | c |
| 14.40573163743707 | -2.28986135222855 | -21.38349395925872 | h |
| 12.69855962063588 | 1.55849388474164  | -20.60271282401644 | c |
| 12.47997182801218 | 2.36016431952724  | -22.50574613889982 | h |
| 11.98656660026432 | 2.76024264155689  | -18.26814726164153 | c |
| 11.13216981846333 | 4.64355269034846  | -18.07900642272642 | h |
| 4.48088067612293  | 2.61998295117370  | 8.52656101677640   | c |
| 4.56132553449350  | 0.68840175815970  | 10.39678037048110  | c |
| 4.78317144709117  | 5.16023766489013  | 9.36051937147341   | c |
| 4.92520320785391  | 1.27542609849658  | 12.94724794536075  | c |
| 4.28500008940157  | -1.29355820204039 | 9.82253242759464   | h |
| 5.15550973176384  | 5.72766900757547  | 11.90924660749756  | c |
| 4.70997037194719  | 6.69531113849882  | 7.95778478415225   | h |
| 5.24087268378886  | 3.80580873941923  | 13.78008566376658  | c |
| 4.92122086190399  | -0.27289270720011 | 14.33800516668761  | h |
| 5.39780339732696  | 7.71699430701531  | 12.47105425626453  | h |
| -4.33339710915316 | 3.55809429122961  | 8.35049779939861   | c |
| -2.82216983295102 | 2.86514393874320  | 10.45991502266732  | c |
| -6.73084786398957 | 4.67905459609019  | 8.84963364552479   | c |
| -3.67306905125474 | 3.26957469246476  | 12.92976404790120  | c |
| -0.94571317332247 | 2.02368231358773  | 10.13670830812372  | h |
| -7.55611738135819 | 5.08395386739377  | 11.32444974678619  | c |
| -7.94078348681038 | 5.24754877422764  | 7.25196294580690   | h |
| -6.05617934965803 | 4.38653156565628  | 13.43508837483597  | c |
| -2.42765881874851 | 2.74723038200420  | 14.51344960536287  | h |
| -9.43149681757943 | 5.93324197194982  | 11.63596531172857  | h |
| -0.16255641888738 | -4.92395318393449 | 8.75937291715445   | c |
| -2.02652144729742 | -4.36057591801744 | 10.61447689450776  | c |
| 2.02159358561135  | -6.26898756342487 | 9.57801403863610   | c |

|                   |                   |                    |   |
|-------------------|-------------------|--------------------|---|
| -1.71671409519700 | -5.10572288483033 | 13.13041521359209  | c |
| -3.71458627357809 | -3.27946880736753 | 10.05445970181649  | h |
| 2.31038321213443  | -7.01575754587968 | 12.09192667950224  | c |
| 3.50460020622792  | -6.71892437420634 | 8.18904801567892   | h |
| 0.45043178268715  | -6.46072948343066 | 13.94461580031934  | c |
| -3.17805743143775 | -4.58137298383435 | 14.51683207985973  | h |
| 4.01463364372789  | -8.07989730667414 | 12.63692951407014  | h |
| -2.83250075814064 | -4.37620955459500 | -8.49394863585429  | c |
| -1.05403344408943 | -4.07612043876600 | -10.48900406362222 | c |
| -5.31688529644050 | -5.16775467810648 | -9.15985556252309  | c |
| -1.74165854285750 | -4.51296537443385 | -13.00109787070082 | c |
| 0.87866341981591  | -3.44573366957414 | -10.04202931539298 | h |
| -5.98121008004911 | -5.61358967216403 | -11.67498848916210 | c |
| -6.73366000017103 | -5.44021637438753 | -7.65868060318708  | h |
| -4.21947139006950 | -5.29115191093939 | -13.67317275426502 | c |
| -0.31894446202351 | -4.20396464751899 | -14.48729425968139 | h |
| -7.92151904310130 | -6.23301971471378 | -12.10281643896402 | h |
| 5.08015133629802  | -0.18880165794616 | -8.81224075983306  | c |
| 4.18473451932063  | 1.48669462374897  | -10.71736608393933 | c |
| 6.59279933890817  | -2.26856359652613 | -9.60675178316189  | c |
| 4.76021536742549  | 1.08518969853156  | -13.26354738845610 | c |
| 2.97807077983807  | 3.09301328657899  | -10.17200779971913 | h |
| 7.16979327380291  | -2.64551958890545 | -12.15395329270724 | c |
| 7.31546316933922  | -3.60194059451872 | -8.18052379483196  | h |
| 6.26890133846237  | -0.98555171175147 | -14.06051714327625 | c |
| 3.97539847208832  | 2.39302304825362  | -14.67880813714122 | h |
| 8.36056626894172  | -4.26884120068724 | -12.68210058980145 | h |
| -2.47047036006657 | 4.59111652904388  | -8.95097261199392  | c |
| -3.74242321458061 | 3.05649796746374  | -10.75732260087712 | c |
| -1.29020898180459 | 6.83820361102047  | -9.84809240727168  | c |
| -3.81082616682342 | 3.73124482377368  | -13.30976922472851 | c |
| -4.64042087489665 | 1.28663695114168  | -10.12952186676816 | h |
| -1.37869934152869 | 7.50253333511213  | -12.40033168184715 | c |
| -0.29629447973684 | 8.07109483611681  | -8.49612759593780  | h |
| -2.63818905838132 | 5.97070652024933  | -14.20864571400327 | c |
| -4.76445983667485 | 2.45909690037926  | -14.65220369388132 | h |
| -0.45684645611249 | 9.26605107499702  | -13.01114043565243 | h |

**[{Au<sub>3</sub>Cu<sub>2</sub>(C<sub>2</sub>C<sub>6</sub>H<sub>4</sub>Fc)<sub>6</sub>}Au<sub>3</sub>(PPh<sub>2</sub>C<sub>6</sub>H<sub>4</sub>PPh<sub>2</sub>)<sub>3</sub>]<sup>2+</sup> (4), D<sub>3h</sub>-symmetry**

|                   |                    |                   |    |
|-------------------|--------------------|-------------------|----|
| -1.87308074513357 | -3.24427101725038  | 0.00000000000000  | au |
| -1.87308074513357 | 3.24427101725038   | 0.00000000000000  | au |
| 3.74616149026731  | 0.00000000000000   | 0.00000000000000  | au |
| -4.61966278439853 | -8.00149065641336  | 0.00000000000000  | au |
| -4.61966278439853 | 8.00149065641336   | 0.00000000000000  | au |
| 9.23932556879703  | 0.00000000000000   | 0.00000000000000  | au |
| 0.00000000000000  | 0.00000000000000   | 3.71022778218611  | cu |
| 0.00000000000000  | 0.00000000000000   | -3.71022778218611 | cu |
| -0.97035602442828 | -10.63829218785759 | 0.00000000000000  | p  |
| -8.72785327535203 | -6.15949906179891  | 0.00000000000000  | p  |
| -0.97035602442828 | 10.63829218785759  | 0.00000000000000  | p  |
| -8.72785327535203 | 6.15949906179891   | 0.00000000000000  | p  |
| 9.69820929978025  | -4.47879312605862  | 0.00000000000000  | p  |
| 9.69820929978025  | 4.47879312605862   | 0.00000000000000  | p  |
| -1.96037092450592 | -3.39546204292502  | 3.82412197398702  | c  |
| -1.96037092450592 | 3.39546204292502   | 3.82412197398702  | c  |
| 3.92074184901184  | 0.00000000000000   | 3.82412197398702  | c  |
| -1.96037092450592 | -3.39546204292502  | -3.82412197398702 | c  |
| 3.92074184901184  | 0.00000000000000   | -3.82412197398702 | c  |
| -1.96037092450592 | 3.39546204292502   | -3.82412197398702 | c  |
| -2.34674571060512 | -4.06468280321241  | 6.06608114879508  | c  |
| -2.34674571060512 | 4.06468280321241   | 6.06608114879508  | c  |
| 4.69349142121025  | 0.00000000000000   | 6.06608114879508  | c  |

|                    |                    |                   |   |
|--------------------|--------------------|-------------------|---|
| -2.34674571060512  | -4.06468280321241  | -6.06608114879508 | c |
| 4.69349142121025   | 0.00000000000000   | -6.06608114879508 | c |
| -2.34674571060512  | 4.06468280321241   | -6.06608114879508 | c |
| 2.04521500001429   | 8.89405706862147   | 0.00000000000000  | c |
| 3.17914421525344   | 8.15703344637399   | -2.29852403890651 | c |
| 3.17914421525344   | 8.15703344637399   | 2.29852403890651  | c |
| 5.47462607645255   | 6.83173637589080   | -2.29852403890651 | c |
| 5.47462607645255   | 6.83173637589080   | 2.29852403890651  | c |
| 6.67987186412764   | 6.21823668052412   | 0.00000000000000  | c |
| 6.67987186412764   | -6.21823668052412  | 0.00000000000000  | c |
| 5.47462607645255   | -6.83173637589080  | -2.29852403890651 | c |
| 5.47462607645255   | -6.83173637589080  | 2.29852403890651  | c |
| 3.17914421525344   | -8.15703344637399  | -2.29852403890651 | c |
| 3.17914421525344   | -8.15703344637399  | 2.29852403890651  | c |
| 2.04521500001429   | -8.89405706862147  | 0.00000000000000  | c |
| -8.72508686414190  | -2.67582038809739  | 0.00000000000000  | c |
| -8.65377029170591  | -1.32529707048321  | -2.29852403890651 | c |
| -8.65377029170591  | -1.32529707048321  | 2.29852403890651  | c |
| -8.65377029170591  | 1.32529707048321   | -2.29852403890651 | c |
| -8.65377029170591  | 1.32529707048321   | 2.29852403890651  | c |
| -8.72508686414190  | 2.67582038809739   | 0.00000000000000  | c |
| 11.45779925090829  | -5.70419096848734  | 2.75366212073430  | c |
| 12.97487882134901  | -4.03854541468220  | 4.17580581310221  | c |
| 11.44921841058744  | -8.30447460193013  | 3.36866684140220  | c |
| 14.47076428137878  | -4.94908089079327  | 6.17178542456353  | c |
| 12.94115728723896  | -9.20817313878131  | 5.36633202375471  | c |
| 14.45892465123325  | -7.53482023797320  | 6.76744132988606  | c |
| 11.45779925090829  | 5.70419096848734   | 2.75366212073430  | c |
| 12.97487882134901  | 4.03854541468220   | 4.17580581310221  | c |
| 11.44921841058744  | 8.30447460193013   | 3.36866684140220  | c |
| 14.47076428137878  | 4.94908089079327   | 6.17178542456353  | c |
| 12.94115728723896  | 9.20817313878131   | 5.36633202375471  | c |
| 14.45892465123325  | 7.53482023797320   | 6.76744132988606  | c |
| -0.78892533870627  | 12.77484070699254  | 2.75366212073430  | c |
| -2.98995648722263  | 13.25584737765408  | 4.17580581310221  | c |
| 1.46727676506047   | 14.06755129801032  | 3.36866684140220  | c |
| -2.94935236387831  | 15.00658992524708  | 6.17178542456353  | c |
| 1.50393321701067   | 15.81145753450976  | 5.36633202375471  | c |
| -0.70411658658279  | 16.28920617835965  | 6.76744132988606  | c |
| -10.66887391220185 | 7.07064973850514   | 2.75366212073430  | c |
| -9.98492233412641  | 9.21730196297192   | 4.17580581310221  | c |
| -12.91649517564793 | 5.76307669608016   | 3.36866684140220  | c |
| -11.52141191750044 | 10.05750903445382  | 6.17178542456353  | c |
| -14.44509050424959 | 6.60328439572838   | 5.36633202375471  | c |
| -13.75480806465055 | 8.75438594038647   | 6.76744132988606  | c |
| -10.66887391220185 | -7.07064973850514  | 2.75366212073430  | c |
| -9.98492233412641  | -9.21730196297192  | 4.17580581310221  | c |
| -12.91649517564793 | -5.76307669608016  | 3.36866684140220  | c |
| -11.52141191750044 | -10.05750903445382 | 6.17178542456353  | c |
| -14.44509050424959 | -6.60328439572838  | 5.36633202375471  | c |
| -13.75480806465055 | -8.75438594038647  | 6.76744132988606  | c |
| -0.78892533870627  | -12.77484070699254 | 2.75366212073430  | c |
| -2.98995648722263  | -13.25584737765408 | 4.17580581310221  | c |
| 1.46727676506047   | -14.06755129801032 | 3.36866684140220  | c |
| -2.94935236387831  | -15.00658992524708 | 6.17178542456353  | c |
| 1.50393321701067   | -15.81145753450976 | 5.36633202375471  | c |
| -0.70411658658279  | -16.28920617835965 | 6.76744132988606  | c |
| 11.45779925090829  | -5.70419096848734  | -2.75366212073430 | c |
| 12.97487882134901  | -4.03854541468220  | -4.17580581310221 | c |
| 11.44921841058744  | -8.30447460193013  | -3.36866684140220 | c |
| 14.47076428137878  | -4.94908089079327  | -6.17178542456353 | c |
| 12.94115728723896  | -9.20817313878131  | -5.36633202375471 | c |
| 14.45892465123325  | -7.53482023797320  | -6.76744132988606 | c |
| -0.78892533870627  | -12.77484070699254 | -2.75366212073430 | c |

|                    |                    |                    |   |
|--------------------|--------------------|--------------------|---|
| -2.98995648722263  | -13.25584737765408 | -4.17580581310221  | c |
| 1.46727676506047   | -14.06755129801032 | -3.36866684140220  | c |
| -2.94935236387831  | -15.00658992524708 | -6.17178542456353  | c |
| 1.50393321701067   | -15.81145753450976 | -5.36633202375471  | c |
| -0.70411658658279  | -16.28920617835965 | -6.76744132988606  | c |
| -10.66887391220185 | -7.07064973850514  | -2.75366212073430  | c |
| -9.98492233412641  | -9.21730196297192  | -4.17580581310221  | c |
| -12.91649517564793 | -5.76307669608016  | -3.36866684140220  | c |
| -11.52141191750044 | -10.05750903445382 | -6.17178542456353  | c |
| -14.44509050424959 | -6.60328439572838  | -5.36633202375471  | c |
| -13.75480806465055 | -8.75438594038647  | -6.76744132988606  | c |
| -10.66887391220185 | 7.07064973850514   | -2.75366212073430  | c |
| -12.91649517564793 | 5.76307669608016   | -3.36866684140220  | c |
| -9.98492233412641  | 9.21730196297192   | -4.17580581310221  | c |
| -14.44509050424959 | 6.60328439572838   | -5.36633202375471  | c |
| -11.52141191750044 | 10.05750903445382  | -6.17178542456353  | c |
| -13.75480806465055 | 8.75438594038647   | -6.76744132988606  | c |
| -0.78892533870627  | 12.77484070699254  | -2.75366212073430  | c |
| 1.46727676506047   | 14.06755129801032  | -3.36866684140220  | c |
| -2.98995648722263  | 13.25584737765408  | -4.17580581310221  | c |
| 1.50393321701067   | 15.81145753450976  | -5.36633202375471  | c |
| -2.94935236387831  | 15.00658992524708  | -6.17178542456353  | c |
| -0.70411658658279  | 16.28920617835965  | -6.76744132988606  | c |
| 11.45779925090829  | 5.70419096848734   | -2.75366212073430  | c |
| 12.97487882134901  | 4.03854541468220   | -4.17580581310221  | c |
| 11.44921841058744  | 8.30447460193013   | -3.36866684140220  | c |
| 14.47076428137878  | 4.94908089079327   | -6.17178542456353  | c |
| 12.94115728723896  | 9.20817313878131   | -5.36633202375471  | c |
| 14.45892465123325  | 7.53482023797320   | -6.76744132988606  | c |
| 8.00229488695725   | 0.00000000000000   | 16.46635738949354  | c |
| 8.49712550198291   | -2.19859466415170  | 18.03134679384943  | c |
| 8.49712550198291   | 2.19859466415170   | 18.03134679384943  | c |
| 9.22272113628891   | -1.35805022378247  | 20.50675655661546  | c |
| 9.22272113628891   | 1.35805022378247   | 20.50675655661546  | c |
| 8.00229488695725   | 0.00000000000000   | -16.46635738949354 | c |
| 8.49712550198291   | 2.19859466415170   | -18.03134679384943 | c |
| 8.49712550198291   | -2.19859466415170  | -18.03134679384943 | c |
| 9.22272113628891   | 1.35805022378247   | -20.50675655661546 | c |
| 9.22272113628891   | -1.35805022378247  | -20.50675655661546 | c |
| -4.00114744347857  | -6.93019066067932  | -16.46635738949354 | c |
| -2.34452391921122  | -8.45802387593765  | -18.03134679384943 | c |
| -6.15260158277173  | -6.25942921178597  | -18.03134679384943 | c |
| -3.43525457473361  | -8.66613590793721  | -20.50675655661546 | c |
| -5.78746656155526  | -7.30808568415464  | -20.50675655661546 | c |
| -4.00114744347857  | 6.93019066067932   | -16.46635738949354 | c |
| -6.15260158277173  | 6.25942921178597   | -18.03134679384943 | c |
| -2.34452391921122  | 8.45802387593765   | -18.03134679384943 | c |
| -5.78746656155526  | 7.30808568415464   | -20.50675655661546 | c |
| -3.43525457473361  | 8.66613590793721   | -20.50675655661546 | c |
| -4.00114744347857  | -6.93019066067932  | 16.46635738949354  | c |
| -6.15260158277173  | -6.25942921178597  | 18.03134679384943  | c |
| -2.34452391921122  | -8.45802387593765  | 18.03134679384943  | c |
| -5.78746656155526  | -7.30808568415464  | 20.50675655661546  | c |
| -3.43525457473361  | -8.66613590793721  | 20.50675655661546  | c |
| -4.00114744347857  | 6.93019066067932   | 16.46635738949354  | c |
| -2.34452391921122  | 8.45802387593765   | 18.03134679384943  | c |
| -6.15260158277173  | 6.25942921178597   | 18.03134679384943  | c |
| -3.43525457473361  | 8.66613590793721   | 20.50675655661546  | c |
| -5.78746656155526  | 7.30808568415464   | 20.50675655661546  | c |
| 15.17210884842073  | 1.35956108625624   | -18.76080446981981 | c |
| 14.45905182966975  | 2.20114362097958   | -16.27343560350218 | c |
| 15.17210884842073  | -1.35956108625624  | -18.76080446981981 | c |
| 14.02255791673253  | 0.00000000000000   | -14.73682263077854 | c |
| 14.45905182966975  | -2.20114362097958  | -16.27343560350218 | c |

|                    |                    |                    |    |
|--------------------|--------------------|--------------------|----|
| -6.40863998551570  | -13.81921223484310 | -18.76080446981981 | c  |
| -5.32327962168847  | -13.62247800961964 | -16.27343560350218 | c  |
| -8.76346886290504  | -12.45965114858694 | -18.76080446981981 | c  |
| -7.01127895836627  | -12.14389138192899 | -14.73682263077854 | c  |
| -9.13577220798127  | -11.42133438864009 | -16.27343560350218 | c  |
| -8.76346886290504  | 12.45965114858694  | -18.76080446981981 | c  |
| -9.13577220798127  | 11.42133438864009  | -16.27343560350218 | c  |
| -6.40863998551570  | 13.81921223484310  | -18.76080446981981 | c  |
| -7.01127895836627  | 12.14389138192899  | -14.73682263077854 | c  |
| -5.32327962168847  | 13.62247800961964  | -16.27343560350218 | c  |
| -8.76346886290504  | -12.45965114858694 | 18.76080446981981  | c  |
| -9.13577220798127  | -11.42133438864009 | 16.27343560350218  | c  |
| -6.40863998551570  | -13.81921223484310 | 18.76080446981981  | c  |
| -7.01127895836627  | -12.14389138192899 | 14.73682263077854  | c  |
| -5.32327962168847  | -13.62247800961964 | 16.27343560350218  | c  |
| -6.40863998551570  | 13.81921223484310  | 18.76080446981981  | c  |
| -5.32327962168847  | 13.62247800961964  | 16.27343560350218  | c  |
| -8.76346886290504  | 12.45965114858694  | 18.76080446981981  | c  |
| -7.01127895836627  | 12.14389138192899  | 14.73682263077854  | c  |
| -9.13577220798127  | 11.42133438864009  | 16.27343560350218  | c  |
| 15.17210884842073  | -1.35956108625624  | 18.76080446981981  | c  |
| 14.45905182966975  | -2.20114362097958  | 16.27343560350218  | c  |
| 15.17210884842073  | 1.35956108625624   | 18.76080446981981  | c  |
| 14.02255791673253  | 0.00000000000000   | 14.73682263077854  | c  |
| 14.45905182966975  | 2.20114362097958   | 16.27343560350218  | c  |
| -5.83092077585844  | 10.09945103869585  | 17.81372448696352  | fe |
| -5.83092077585844  | -10.09945103869585 | 17.81372448696352  | fe |
| 11.66184155171706  | 0.00000000000000   | 17.81372448696352  | fe |
| -5.83092077585844  | -10.09945103869585 | -17.81372448696352 | fe |
| -5.83092077585844  | 10.09945103869585  | -17.81372448696352 | fe |
| 11.66184155171706  | 0.00000000000000   | -17.81372448696352 | fe |
| -10.74791895564156 | 10.26118986344935  | -15.66673219976455 | h  |
| 2.27812121785764   | 8.62606411731247   | -4.11445758933378  | h  |
| 2.27812121785764   | 8.62606411731247   | 4.11445758933378   | h  |
| 6.33133005133719   | 6.28594290622129   | -4.11445758933378  | h  |
| 6.33133005133719   | 6.28594290622129   | 4.11445758933378   | h  |
| 6.33133005133719   | -6.28594290622129  | -4.11445758933378  | h  |
| 6.33133005133719   | -6.28594290622129  | 4.11445758933378   | h  |
| 2.27812121785764   | -8.62606411731247  | -4.11445758933378  | h  |
| 2.27812121785764   | -8.62606411731247  | 4.11445758933378   | h  |
| -8.60945126919475  | -2.34012121109115  | -4.11445758933378  | h  |
| -8.60945126919475  | -2.34012121109115  | 4.11445758933378   | h  |
| -8.60945126919475  | 2.34012121109115   | -4.11445758933378  | h  |
| -8.60945126919475  | 2.34012121109115   | 4.11445758933378   | h  |
| 12.98036408000898  | -2.00921929229929  | 3.70509402122135   | h  |
| 10.26642006166847  | -9.63985119659578  | 2.29490988578528   | h  |
| 15.65070349936144  | -3.62828216285619  | 7.26743378057615   | h  |
| 12.92422020146750  | -11.23949069440492 | 5.82861610063428   | h  |
| 15.63519188890771  | -8.25279939448293  | 8.32961307742282   | h  |
| 12.98036408000898  | 2.00921929229929   | 3.70509402122135   | h  |
| 10.26642006166847  | 9.63985119659578   | 2.29490988578528   | h  |
| 15.65070349936144  | 3.62828216285619   | 7.26743378057615   | h  |
| 12.92422020146750  | 11.23949069440492  | 5.82861610063428   | h  |
| 15.63519188890771  | 8.25279939448293   | 8.32961307742282   | h  |
| -4.75014709109944  | 12.24593468980843  | 3.70509402122135   | h  |
| 3.21514599411947   | 13.71090617762492  | 2.29490988578528   | h  |
| -4.68316722454932  | 15.36804789897318  | 7.26743378057615   | h  |
| 3.27157436621978   | 16.81244836577738  | 5.82861610063428   | h  |
| -0.67046201649484  | 17.66687306607992  | 8.32961307742282   | h  |
| -8.23021698890952  | 10.23671539750914  | 3.70509402122135   | h  |
| -13.48156605578792 | 4.07105498102924   | 2.29490988578528   | h  |
| -10.96753627481220 | 11.73976573611695  | 7.26743378057615   | h  |
| -16.19579456768724 | 5.57295767137238   | 5.82861610063428   | h  |
| -14.96472987241285 | 9.41407367159703   | 8.32961307742282   | h  |

|                    |                    |                    |   |
|--------------------|--------------------|--------------------|---|
| -8.23021698890952  | -10.23671539750914 | 3.70509402122135   | h |
| -13.48156605578792 | -4.07105498102924  | 2.29490988578528   | h |
| -10.96753627481220 | -11.73976573611695 | 7.26743378057615   | h |
| -16.19579456768724 | -5.57295767137238  | 5.82861610063428   | h |
| -14.96472987241285 | -9.41407367159703  | 8.32961307742282   | h |
| -4.75014709109944  | -12.24593468980843 | 3.70509402122135   | h |
| 3.21514599411947   | -13.71090617762492 | 2.29490988578528   | h |
| -4.68316722454932  | -15.36804789897318 | 7.26743378057615   | h |
| 3.27157436621978   | -16.81244836577738 | 5.82861610063428   | h |
| -0.67046201649484  | -17.66687306607992 | 8.32961307742282   | h |
| 12.98036408000898  | -2.00921929229929  | -3.70509402122135  | h |
| 10.26642006166847  | -9.63985119659578  | -2.29490988578528  | h |
| 15.65070349936144  | -3.62828216285619  | -7.26743378057615  | h |
| 12.92422020146750  | -11.23949069440492 | -5.82861610063428  | h |
| 15.63519188890771  | -8.25279939448293  | -8.32961307742282  | h |
| -4.75014709109944  | -12.24593468980843 | -3.70509402122135  | h |
| 3.21514599411947   | -13.71090617762492 | -2.29490988578528  | h |
| -4.68316722454932  | -15.36804789897318 | -7.26743378057615  | h |
| 3.27157436621978   | -16.81244836577738 | -5.82861610063428  | h |
| -0.67046201649484  | -17.66687306607992 | -8.32961307742282  | h |
| -8.23021698890952  | -10.23671539750914 | -3.70509402122135  | h |
| -13.48156605578792 | -4.07105498102924  | -2.29490988578528  | h |
| -10.96753627481220 | -11.73976573611695 | -7.26743378057615  | h |
| -16.19579456768724 | -5.57295767137238  | -5.82861610063428  | h |
| -14.96472987241285 | -9.41407367159703  | -8.32961307742282  | h |
| -13.48156605578792 | 4.07105498102924   | -2.29490988578528  | h |
| -8.23021698890952  | 10.23671539750914  | -3.70509402122135  | h |
| -16.19579456768724 | 5.57295767137238   | -5.82861610063428  | h |
| -10.96753627481220 | 11.73976573611695  | -7.26743378057615  | h |
| -14.96472987241285 | 9.41407367159703   | -8.32961307742282  | h |
| 3.21514599411947   | 13.71090617762492  | -2.29490988578528  | h |
| -4.75014709109944  | 12.24593468980843  | -3.70509402122135  | h |
| 3.27157436621978   | 16.81244836577738  | -5.82861610063428  | h |
| -4.68316722454932  | 15.36804789897318  | -7.26743378057615  | h |
| -0.67046201649484  | 17.66687306607992  | -8.32961307742282  | h |
| 12.98036408000898  | 2.00921929229929   | -3.70509402122135  | h |
| 10.26642006166847  | 9.63985119659578   | -2.29490988578528  | h |
| 15.65070349936144  | 3.62828216285619   | -7.26743378057615  | h |
| 12.92422020146750  | 11.23949069440492  | -5.82861610063428  | h |
| 15.63519188890771  | 8.25279939448293   | -8.32961307742282  | h |
| 8.33686707415280   | -4.18236237632328  | 17.44492418473314  | h |
| 8.33686707415280   | 4.18236237632328   | 17.44492418473314  | h |
| 9.72196539174800   | -2.58104005445496  | 22.10832439656710  | h |
| 9.72196539174800   | 2.58104005445496   | 22.10832439656710  | h |
| 8.33686707415280   | 4.18236237632328   | -17.44492418473314 | h |
| 8.33686707415280   | -4.18236237632328  | -17.44492418473314 | h |
| 9.72196539174800   | 2.58104005445496   | -22.10832439656710 | h |
| 9.72196539174800   | -2.58104005445496  | -22.10832439656710 | h |
| -0.54640147134817  | -9.31111986235210  | -17.44492418473314 | h |
| -7.79046560280467  | -5.12875748602877  | -17.44492418473314 | h |
| -2.62573644053084  | -9.70998903119439  | -22.10832439656710 | h |
| -7.09622895121717  | -7.12894897673941  | -22.10832439656710 | h |
| -7.79046560280467  | 5.12875748602877   | -17.44492418473314 | h |
| -0.54640147134817  | 9.31111986235210   | -17.44492418473314 | h |
| -7.09622895121717  | 7.12894897673941   | -22.10832439656710 | h |
| -2.62573644053084  | 9.70998903119439   | -22.10832439656710 | h |
| -7.79046560280467  | -5.12875748602877  | 17.44492418473314  | h |
| -0.54640147134817  | -9.31111986235210  | 17.44492418473314  | h |
| -7.09622895121717  | -7.12894897673941  | 22.10832439656710  | h |
| -2.62573644053084  | -9.70998903119439  | 22.10832439656710  | h |
| -0.54640147134817  | 9.31111986235210   | 17.44492418473314  | h |
| -7.79046560280467  | 5.12875748602877   | 17.44492418473314  | h |
| -2.62573644053084  | 9.70998903119439   | 22.10832439656710  | h |
| -7.09622895121717  | 7.12894897673941   | 22.10832439656710  | h |

|                    |                    |                    |   |
|--------------------|--------------------|--------------------|---|
| 15.61204753817863  | 2.57836947646280   | -20.38344498297191 | h |
| 15.61204753817863  | -2.57836947646280  | -20.38344498297191 | h |
| 14.26041057262326  | -4.17737592167727  | -15.66673219976455 | h |
| -5.57309030213011  | -14.80961451138437 | -20.38344498297191 | h |
| -10.03895723604847 | -12.23124503492159 | -20.38344498297191 | h |
| -10.74791895564156 | -10.26118986344935 | -15.66673219976455 | h |
| -10.03895723604847 | 12.23124503492159  | -20.38344498297191 | h |
| -5.57309030213011  | 14.80961451138437  | -20.38344498297191 | h |
| -3.51249161698173  | 14.43856578512657  | -15.66673219976455 | h |
| -10.03895723604847 | -12.23124503492159 | 20.38344498297191  | h |
| -5.57309030213011  | -14.80961451138437 | 20.38344498297191  | h |
| -3.51249161698173  | -14.43856578512657 | 15.66673219976455  | h |
| -5.57309030213011  | 14.80961451138437  | 20.38344498297191  | h |
| -10.03895723604847 | 12.23124503492159  | 20.38344498297191  | h |
| -10.74791895564156 | 10.26118986344935  | 15.66673219976455  | h |
| 15.61204753817863  | -2.57836947646280  | 20.38344498297191  | h |
| 15.61204753817863  | 2.57836947646280   | 20.38344498297191  | h |
| 14.26041057262326  | 4.17737592167727   | 15.66673219976455  | h |
| 14.26041057262326  | -4.17737592167727  | 15.66673219976455  | h |
| -3.51249161698173  | 14.43856578512657  | 15.66673219976455  | h |
| -10.74791895564156 | -10.26118986344935 | 15.66673219976455  | h |
| 14.26041057262326  | 4.17737592167727   | -15.66673219976455 | h |
| -3.51249161698173  | -14.43856578512657 | -15.66673219976455 | h |
| -6.69169209408603  | -11.59035069556396 | 12.76020530654024  | h |
| -6.69169209408603  | 11.59035069556396  | 12.76020530654024  | h |
| 13.38338418817199  | 0.00000000000000   | 12.76020530654024  | h |
| -6.69169209408603  | -11.59035069556396 | -12.76020530654024 | h |
| 13.38338418817199  | 0.00000000000000   | -12.76020530654024 | h |
| -6.69169209408603  | 11.59035069556396  | -12.76020530654024 | h |
| -2.76121894602778  | 4.78257150534201   | 8.62651862085685   | c |
| -0.98843145059519  | 6.30308745239313   | 9.96025246300312   | c |
| -4.96441813074976  | 4.00755047231153   | 9.96025246300312   | c |
| -1.39770638456466  | 6.99676758767488   | 12.47217607376218  | c |
| 0.74365460431836   | 6.91925371002974   | 8.98357849767313   | h |
| -5.36052528301974  | 4.70883302990220   | 12.47217607376218  | c |
| -6.36407679027469  | 2.81560307603388   | 8.98357849767313   | h |
| -3.59529044756700  | 6.22722572315312   | 13.80446021929053  | c |
| 0.03396651566167   | 8.15936238154878   | 13.43580689053129  | h |
| -7.08319835893515  | 4.05026532533332   | 13.43580689053129  | h |
| 5.52243789205560   | 0.00000000000000   | 8.62651862085685   | c |
| 5.95284958134498   | -2.29553698008164  | 9.96025246300312   | c |
| 5.95284958134498   | 2.29553698008164   | 9.96025246300312   | c |
| 6.75823166758440   | -2.28793455777275  | 12.47217607376218  | c |
| 5.62042218595627   | -4.10365063399589  | 8.98357849767313   | h |
| 6.75823166758440   | 2.28793455777275   | 12.47217607376218  | c |
| 5.62042218595627   | 4.10365063399589   | 8.98357849767313   | h |
| 7.19058089513396   | 0.00000000000000   | 13.80446021929053  | c |
| 7.04923184327350   | -4.10909705621542  | 13.43580689053129  | h |
| 7.04923184327350   | 4.10909705621542   | 13.43580689053129  | h |
| -2.76121894602778  | -4.78257150534201  | 8.62651862085685   | c |
| -4.96441813074976  | -4.00755047231153  | 9.96025246300312   | c |
| -0.98843145059519  | -6.30308745239313  | 9.96025246300312   | c |
| -5.36052528301974  | -4.70883302990220  | 12.47217607376218  | c |
| -6.36407679027469  | -2.81560307603388  | 8.98357849767313   | h |
| -1.39770638456466  | -6.99676758767488  | 12.47217607376218  | c |
| 0.74365460431836   | -6.91925371002974  | 8.98357849767313   | h |
| -3.59529044756700  | -6.22722572315312  | 13.80446021929053  | c |
| -7.08319835893515  | -4.05026532533332  | 13.43580689053129  | h |
| 0.03396651566168   | -8.15936238154878  | 13.43580689053129  | h |
| 5.52243789205560   | 0.00000000000000   | -8.62651862085685  | c |
| 5.95284958134498   | 2.29553698008164   | -9.96025246300312  | c |
| 5.95284958134498   | -2.29553698008164  | -9.96025246300312  | c |
| 6.75823166758440   | 2.28793455777275   | -12.47217607376218 | c |
| 5.62042218595627   | 4.10365063399589   | -8.98357849767313  | h |

|                   |                   |                    |   |
|-------------------|-------------------|--------------------|---|
| 6.75823166758440  | -2.28793455777275 | -12.47217607376218 | c |
| 5.62042218595627  | -4.10365063399589 | -8.98357849767313  | h |
| 7.19058089513396  | 0.00000000000000  | -13.80446021929053 | c |
| 7.04923184327350  | 4.10909705621542  | -13.43580689053129 | h |
| 7.04923184327350  | -4.10909705621542 | -13.43580689053129 | h |
| -2.76121894602778 | -4.78257150534201 | -8.62651862085685  | c |
| -0.98843145059519 | -6.30308745239313 | -9.96025246300312  | c |
| -4.96441813074976 | -4.00755047231153 | -9.96025246300312  | c |
| -1.39770638456466 | -6.99676758767488 | -12.47217607376218 | c |
| 0.74365460431836  | -6.91925371002974 | -8.98357849767313  | h |
| -5.36052528301974 | -4.70883302990220 | -12.47217607376218 | c |
| -6.36407679027469 | -2.81560307603388 | -8.98357849767313  | h |
| -3.59529044756700 | -6.22722572315312 | -13.80446021929053 | c |
| 0.03396651566168  | -8.15936238154878 | -13.43580689053129 | h |
| -7.08319835893515 | -4.05026532533332 | -13.43580689053129 | h |
| -2.76121894602778 | 4.78257150534201  | -8.62651862085685  | c |
| -4.96441813074976 | 4.00755047231153  | -9.96025246300312  | c |
| -0.98843145059519 | 6.30308745239313  | -9.96025246300312  | c |
| -5.36052528301974 | 4.70883302990220  | -12.47217607376218 | c |
| -6.36407679027469 | 2.81560307603388  | -8.98357849767313  | h |
| -1.39770638456466 | 6.99676758767488  | -12.47217607376218 | c |
| 0.74365460431836  | 6.91925371002974  | -8.98357849767313  | h |
| -3.59529044756700 | 6.22722572315312  | -13.80446021929053 | c |
| -7.08319835893515 | 4.05026532533332  | -13.43580689053129 | h |
| 0.03396651566167  | 8.15936238154878  | -13.43580689053129 | h |
